## Copy number variants implicate cardiac function and development pathways in earthquake-induced stress cardiomyopathy.

### Authors

Cameron J. Lacey<sup>1,10</sup>, Kit Doudney<sup>2,10</sup>, Paul G. Bridgman<sup>3</sup>, Peter M. George<sup>2,9</sup>, Roger T. Mulder<sup>1</sup>, Julie J. Zarifeh<sup>4</sup>, Bridget Kimber<sup>1</sup>, Murray J. Cadzow<sup>5</sup>, Michael A. Black<sup>5</sup>, Tony R. Merriman<sup>5</sup>, Klaus Lehnert<sup>6</sup>, Vivienne M Bickley<sup>2</sup>, John F. Pearson<sup>7</sup>, Vicky A. Cameron<sup>8</sup>, Martin A. Kennedy<sup>9</sup>.

### Author affiliations

- <sup>1</sup> Department of Psychological Medicine, University of Otago, Christchurch, New Zealand.
- <sup>2</sup> Molecular Pathology Laboratory, Canterbury Health Laboratories, Canterbury District Health Board, Christchurch, New Zealand.
- <sup>3</sup> Department of Cardiology, Christchurch Hospital, Christchurch, New Zealand.
- <sup>4</sup> Psychiatric Consultation Service, Christchurch Hospital, Canterbury District Health Board, Christchurch, New Zealand.
- <sup>5</sup> Department of Biochemistry, University of Otago, Dunedin, New Zealand.
- <sup>6</sup> School of Biological Sciences, University of Auckland, Auckland, New Zealand.
- <sup>7</sup> Biostatistics and Computational Biology Unit, University of Otago, Christchurch, New Zealand.
- <sup>8</sup> Christchurch Heart Institute, Department of Medicine, University of Otago, Christchurch, New Zealand.
- <sup>9</sup> Department of Pathology, University of Otago, Christchurch, New Zealand.
- <sup>10</sup> These authors contributed equally to this work.

### Correspondence

cameron.lacey@otago.ac.nz (C.L.), martin.kennedy@otago.ac.nz (M.K.)

## 1 **Abstract**

2 The pathophysiology of stress cardiomyopathy (SCM), also known as takotsubo  
3 syndrome, is poorly understood. SCM usually occurs sporadically, often in  
4 association with a stressful event, but clusters of cases are reported after major  
5 natural disasters. There is some evidence that this is a familial condition. We  
6 have examined three possible models for an underlying genetic predisposition to  
7 SCM. Our primary study cohort consists of 28 women who suffered SCM as a  
8 result of two devastating earthquakes that struck the city of Christchurch, New  
9 Zealand, in 2010 and 2011. To seek possible underlying genetic factors we  
10 carried out exome analysis, Cardio-MetaboChip genotyping array analysis and  
11 array comparative genomic hybridization on these subjects. The most striking  
12 finding from these analyses was the observation of a markedly elevated rate of  
13 rare, heterogeneous copy number variants (CNV) of uncertain clinical  
14 significance (in 12/28 subjects). Several of these CNVs clearly impacted on  
15 genes of cardiac relevance including *RBFox1*, *GPC5*, *KCNRG*, *CHODL*, and  
16 *GPBP1L1*. There is no physical overlap between the CNVs, and the genes they  
17 impact do not fall into a clear pathophysiological pathway. However, the  
18 recognition that SCM cases display a high rate of unusual CNV, and that SCM  
19 predisposition may therefore be associated with these CNVs, offers a novel  
20 perspective and a new approach by which to understand this enigmatic  
21 condition.

22

## 23 **Introduction**

24 Stress cardiomyopathy (SCM), also known as "broken heart syndrome" or  
25 takotsubo syndrome,<sup>1;2</sup> is a condition that captures widespread public interest.

26 The cardiomyopathy is distinctive and the precipitating emotional event is  
27 typically clearly defined, however the mechanism for the cardiomyopathy and  
28 links between the psychological event and the physical illness are not  
29 understood.

30

31 Sporadic cases of SCM are estimated to account for 1-5% of acute coronary  
32 syndrome presentations.<sup>3-5</sup> Predominantly the condition occurs in post-  
33 menopausal women,<sup>6; 7</sup> and because of this, 5-10% of female presentations with  
34 suspected acute coronary syndrome are attributed to SCM.<sup>8-11</sup> Although SCM  
35 can be fatal, the symptoms are commonly transient and patients generally have  
36 a good prognosis and recover well over a period of days to weeks.<sup>12</sup> In classic  
37 descriptions the cardiomyopathy has a typical pattern but a number of variations  
38 are now widely recognised and it is increasingly apparent that cases can be  
39 quite heterogeneous.<sup>13</sup>

40

41 SCM occurring in clusters around the time of major disasters such as  
42 earthquakes, floods and bushfires is also well recognised.<sup>6; 14-16</sup> Due to the large  
43 impact these events have upon hospital resources and medical infrastructure, it  
44 is rare for such clusters of SCM to be studied in any depth. This was made clear  
45 in reports from the Great East Japan Earthquake.<sup>17</sup> In the Canterbury (New  
46 Zealand) earthquake sequence of 2010 and 2011 the two main events  
47 precipitated large case clusters of SCM.<sup>17-22</sup> Unusually for a major natural  
48 disaster, the tertiary hospital in Christchurch continued to function, allowing the  
49 collection of a relatively large homogenous cohort of cases which have been  
50 followed over several years.<sup>18-23</sup> Most research around this disorder has focused

51 on sporadic SCM associated with heterogenous triggers.<sup>4; 24-26</sup> Although the  
52 presentation of earthquake-associated SCM (EqSCM) appears to be similar to  
53 that of sporadic cases, a key difference is the homogenous nature of the trigger.

54

55 Various mechanisms have been postulated for takotsubo cardiomyopathy,  
56 including that the syndrome arises from stunning of the heart muscle  
57 (myocardium) as a result of either ischemia from spasm of the coronary arteries,  
58 or from the direct effect of catecholamines (dopamine, adrenaline or  
59 noradrenaline) on cardiac myocytes.<sup>4; 24; 27; 28</sup> Despite suggestive

60 pathophysiological observations and theories, most authors conclude that the  
61 aetiology of SCM is poorly understood, and we do not yet have satisfactory  
62 explanations for the origins of this condition.<sup>27; 29-32 26; 32</sup> Some retrospective  
63 case series have suggested that the incidence of SCM is increased in patients  
64 with anxiety conditions, but in our studies we did not find any correlation with  
65 psychiatric or anxiety disorders.<sup>19; 23</sup>

66

67 Amongst the models that may be proposed for SCM aetiology, it is worth  
68 considering the possible contribution of genetic factors. Many forms of  
69 cardiomyopathy have genetic origins.<sup>33; 34</sup> Hypertrophic cardiomyopathy is the  
70 most common form of familial heart disease and a leading cause of sudden  
71 cardiac death. It is inherited in an autosomal dominant Mendelian manner with  
72 variable expressivity and age-related penetrance.<sup>33</sup> These cardiomyopathies  
73 show considerable genetic heterogeneity, with cases now attributed to some  
74 1400 mutations in 11 genes, all of which contribute to cardiac sarcomere  
75 function. Familial dilated cardiomyopathy is also frequently attributable to an

76 underlying genetic predisposition and at least 50 genes have now been  
77 implicated, with most eliciting disease as dominant mutations.<sup>34</sup>  
78  
79 Evidence for genetic contributions to SCM are not as strong as for other  
80 cardiomyopathies. However, there are several examples of familial occurrence  
81 of SCM involving siblings<sup>35-37</sup> or mother-daughter pairs,<sup>38-42</sup> and a large Swedish  
82 study of SCM identified three families in which several close relatives developed  
83 the condition.<sup>43</sup> The overall rarity of SCM would suggest that these familial  
84 clusters are significant, and it is quite possible that more overt familial  
85 relationships in this disorder are obscured by the simultaneous requirement for  
86 two key circumstances (in most cases): post-menopausal status and  
87 environmental exposure to a sudden major stressful event. Occasional cases of  
88 SCM occur in younger women or males, and a proportion of patients report no  
89 preceding stressor,<sup>44</sup> suggesting that an intrinsic pathogenic mechanism is  
90 involved. The recurrence of SCM in some patients, including one Christchurch  
91 EqSCM case,<sup>22</sup> also implies a biological vulnerability.  
92  
93 These observations have prompted consideration of genetic susceptibility to this  
94 condition.<sup>39; 42; 45; 46</sup> Until recently, genetic studies were restricted to candidate  
95 gene analysis in case series of sporadic SCM patients,<sup>47-51</sup> but these have  
96 yielded mainly negative findings. One candidate gene study reported a  
97 significant difference in the frequency of a *GRK5* polymorphism in cases,<sup>52</sup> but  
98 this has not been replicated and past history of single gene association studies  
99 suggests it is unlikely to be meaningful.<sup>53</sup> More recently, another candidate gene  
100 study has implicated estrogen receptor genes as potential risk factors for

101 SCM.<sup>54</sup> In an effort to capture genome-wide data, exome sequencing<sup>55-58</sup> was  
102 recently applied to a sample of sporadic SCM cases.<sup>42</sup> Although this analysis did  
103 not reveal any difference in allele frequency or burden between SCM cases and  
104 population controls (28 adults with normal echocardiograms), it was noted that  
105 two thirds of the cases carried a rare deleterious variant within at least one gene  
106 of a large set of adrenergic pathway genes, and 11 genes harboured a variant in  
107 two or more cases. However, the significance of these rare variants remains  
108 unclear.

109

110 In this study, we set out to explore the role of genetic factors in predisposition to  
111 EqSCM. We specifically tested three discrete hypotheses for potential genetic  
112 contributions to risk of SCM: (i) an essentially Mendelian hypothesis that rare  
113 genetic variants in one or a few key genes cause predisposition, which was  
114 tested by whole exome sequencing (WES); (ii) that SCM was a complex  
115 disorder with genetic contributions from multiple common variants, which was  
116 tested using the Cardio-MetaboChip genotyping array; and (iii) that rare copy  
117 number variants (CNV) impacting on relevant genes contribute to risk, which  
118 was tested by array comparative genomic hybridization (aCGH).

119

## 120 **Material and Methods**

### 121 **Cases**

122 The September 2010 earthquake of magnitude 7.1 on the Richter scale (Mw  
123 7.1) in Christchurch (New Zealand) triggered eight cases of EqSCM, and the  
124 shallow highly destructive quake (Mw 6.3) that followed in February 2011  
125 triggered 21 cases over four days. One woman presented after both quakes<sup>22</sup>,

126 and one was in hospital during the initial quake. Enrolment of this latter  
127 participant was delayed, and her sample was available for aCGH analysis  
128 (n=28) but not for Cardio-Metabolome analysis (n=27). The steps leading to  
129 recruitment of our EqSCM cohort are detailed elsewhere<sup>20; 21</sup>, but briefly, our  
130 study commenced the day of the first earthquake with the creation of a register  
131 of prospectively identified earthquake stress cardiomyopathy cases. As our  
132 hospital was still functioning we could build a cohort with first-world data from  
133 complete single centre capture. After the second earthquake the study was  
134 extended.<sup>20-22</sup>

135

136 Inclusion criteria: i) Meeting modified Mayo criteria for stress cardiomyopathy  
137 and admitted to Christchurch Hospital within one week of either the September  
138 2010 or February 2011 earthquake; ii) age over 18; iii) informed consent given.  
139 Exclusion criteria: i) unable to understand English sufficiently to be able to  
140 complete questionnaires.

141

142 All participants were recruited with informed consent, including discussion of the  
143 possibility of incidental findings from genetic analyses, and return of such  
144 findings after consultation with a medical geneticist. The Southern Health and  
145 Disability Ethics Committee (New Zealand) approved this study.

146

#### 147 *DNA extraction*

148 Peripheral blood samples were obtained from consenting participants. Genomic  
149 DNA was extracted from 3 mL peripheral blood using NucleoMag extraction kits  
150 (Machery-Nagel GmbH, Düren, Germany) on a KingFisher™ Flex Magnetic

151 liquid-handling robot (Thermo Fisher Scientific, Inc, Waltham, MA). DNA was  
152 quantified by analysis with the Nanodrop<sup>TM</sup> (ThermoFisher), and, where  
153 appropriate, the Tapestation 4200 system (Agilent Technologies).

154

#### 155 *Exome analysis*

156 We applied WES to a subset (24 of 28) EqSCM cases. The exome capture and  
157 sequencing was carried out in two batches of 12, during 2012-13 (New Zealand  
158 Genomics Limited, Dunedin, New Zealand). DNA was processed with Illumina  
159 TruSeq sample preparation and exome enrichment kits (which capture ~62Mb of  
160 genomic DNA), and sequencing (100bp paired-end reads) was carried out on an  
161 Illumina HiSeq2000 system. Good quality sequence was obtained across all  
162 exomes, with very few unassigned reads, and greater than 20 million sequence  
163 reads per sample at mean quality scores (Phred) of Q37. Raw read data were  
164 aligned to the GRCh37 human reference genome using the Burrows-Wheeler  
165 Aligner (BWA),<sup>59</sup> and processed through the Broad GATK pipeline.<sup>60</sup> The  
166 alignment process included removal of reads from duplicate fragments,  
167 realignment around known indels, and recalibration of all base quality scores.  
168 Joint variant calling was performed with GATK's HaplotypeCaller. This included  
169 *de novo* assembly at each potential variant locus. Variants were annotated and  
170 analysed using Ingenuity Variant Analysis (IVA) software (QIAGEN, Redwood  
171 City, CA, USA), MutationTaster2,<sup>61</sup> SnpEff,<sup>62</sup> SeattleSeq annotation server,<sup>55</sup>  
172 and Galaxy (via usegalaxy.org).<sup>63</sup> Allele frequencies and additional annotations  
173 were drawn from 1000 Genomes project,<sup>64</sup> NHLBI GO Exome Sequencing  
174 Project (ESP), Seattle, WA (URL: <http://evs.gs.washington.edu/EVS/>), ClinVar,<sup>65</sup>  
175 and Exome Aggregation Consortium (ExAC), Cambridge, MA (URL:



176 <http://exac.broadinstitute.org>). Promising gene variants were inspected by  
177 Sanger sequence analysis on the appropriate genomic DNA samples.

178

#### 179 *Cardio-MetaboChip Analysis*

180 Three groups were genotyped using the Illumina Cardio-MetaboChip: 27 out of  
181 28 female Christchurch EqSCM cases, 133 heart-healthy controls from the  
182 Canterbury Healthy Volunteers Study (HVOLs, 54 F / 79 M),<sup>66</sup> and 157 patients  
183 recruited for an ongoing study of premature coronary heart disease and  
184 consented for genotyping (CHD, 64 F / 93 M). DNA samples were run on the  
185 Cardio-MetaboChip and scanned on the Illumina® iScan platform by  
186 AgResearch Limited (Invermay, New Zealand).

187

188 Quality control with summary analysis of allele and genotype frequencies,  
189 Hardy-Weinberg equilibrium tests, and missing genotype rates were performed  
190 with PLINK version 1.07 software.<sup>67</sup> SNPs with a minor allele frequency of <0.05  
191 and those that failed the Hardy-Weinberg equilibrium test ( $p < 0.001$ ) were  
192 excluded from the analysis, leaving 141,095 SNPs in the analysis (Table 1).

193 Three samples from the CHD Study were also removed after analysis of  
194 relatedness. Principal Component Analysis (PCA, Eigenstrat 4.2) was  
195 performed on an independent subset of almost 50,000 SNPs; the first principal  
196 component explained 6% of the variation, subsequent components all less than  
197 0.5%, and matched self-reported ethnicity (visual inspection). Hence the first  
198 principal component was subsequently included as a factor in the logistic  
199 regression. Logistic regression was performed to evaluate differences in SNP  
200 minor allele frequencies between groups, adjusted for ethnicity and gender,

201 using an additive genetic model (R 3.01 software<sup>68</sup>). P values were adjusted for  
202 false discovery rate (FDR) using the Benjamini Yekutieli method.<sup>69</sup> Pathway  
203 analysis was performed for the leading 100 SNPs in each pairwise group  
204 comparison, using MetaCore from GeneGo (Thomson Reuters).

205

#### 206 *CNV detection and analysis*

207 Array comparative genomic hybridisation (aCGH) was undertaken on 28  
208 EqSCM cases to examine structural variants in the cohort. For this analysis, we  
209 used either the Nimblegen 135k oligo array (CGX12) (Roche NimbleGen Inc,  
210 Madison, WI, USA), capable of genome-wide screening for CNV to a resolution  
211 of 10kb in well-categorised pathogenic genomic regions, and 50kb elsewhere or  
212 the Agilent 180k HD oligo array (Sureprint G3 Human 4x180k) (Agilent  
213 Technologies, Santa Clara, CA, USA), which has a similar resolution.

214

215 Pooled reference DNA samples (catalogue numbers G147A and G152A) were  
216 purchased from Promega (Madison, WI, USA). EqSCM case and reference  
217 DNA samples (0.5-1 µg each) were labelled with Cy3 and Cy5 dyes  
218 respectively, purified, hybridized, and washed according to Nimblegen and  
219 Agilent protocols. Microarrays were scanned on a GenePix 4000B laser scanner  
220 (Axon Instruments, CA, USA) or a G2600D Agilent SureScan microarray  
221 scanner (Agilent Technologies). Data was processed using NimbleScan (Roche  
222 Nimblegen Inc) or Cytogenomics software (Agilent Technologies) with the  
223 default algorithms and analysis settings, but with a 5 probe minimum calling  
224 threshold. All arrays passed QC metrics for derivative log ratio spread (DLRS)  
225 values of <0.2. CNV data was visualised and interpreted using Genoglyphix

226 software (Perkin Elmer) and NCBI genome browser software (genome build  
227 hg19 (GRCh37)). The EqSCM aCGH data were assessed against many CNV  
228 databases including Genoglyphix Chromosome Aberration Database (containing  
229 over 14,000 validated variants from 50,000 samples) (Perkin Elmer, Waltham,  
230 MA, USA),<sup>70</sup> DECIPHER,<sup>71</sup> and the Database of Genomic Variation (DGV,  
231 containing CNV data from over 35,000 unaffected individuals).<sup>72</sup> CNVs were  
232 classified as thought to be benign (TBB), uncertain clinical significance (UCS),  
233 or clinically significant (CS) using an evidence-based approach<sup>73-76</sup> which  
234 included database comparisons (frequency in cases/controls and relation to  
235 phenotype), gene content, gene function and dosage sensitivity. A broad  
236 summary of our CNV interpretation algorithm is depicted in Figure S1. Rare  
237 CNVs are defined as those that occur at a frequency of  $\leq 1\%$ . We classified our  
238 rare CNV frequency using larger DGV studies containing  $>1000$  individuals.<sup>77-81</sup>  
239

## 240 **Results**

### 241 *Exome Analysis*

242 To test the potential for an essentially Mendelian predisposition to EqSCM, WES  
243 was carried out on 24 of the 28 Christchurch EqSCM cases. Several  
244 approaches to analysis of the identified variants were used, all of them  
245 hypothesising the involvement of gene variants with a low population minor  
246 allele frequency (MAF), that were over-represented in the EqSCM cohort. We  
247 carried out various iterations of filtering using variant allele frequency data  
248 derived from large population databases (1000 Genomes; NHBLI Exome  
249 Sequencing Project), followed by careful manual inspection of remaining  
250 variants. For example, excluding all variants present in these databases with an

251 allele frequency > 3%, and selecting for any present in at least 4/24 EqSCM  
252 exomes, identified variants in 131 genes, none of which proved to be convincing  
253 on closer analysis. We also carried out ranking of gene variants by predicted  
254 functional impact using various approaches.<sup>61; 62; 82</sup> Once again, none of the  
255 variants identified in these analyses proved to be significantly enriched amongst  
256 our EqSCM exomes.

257

258 Mitochondrial DNA reads can be recovered from exome data<sup>83</sup>. We carried out  
259 manual inspection of BAM files of mitochondrial DNA for our exome data  
260 compared with non-disease control exomes<sup>84</sup>. No unusual variants were  
261 detected in mitochondrial sequences of the EqSCM samples.

262

263 Finally, the 11 genes listed in Figure 2 of Goodloe et al (2014),<sup>42</sup> as well as a  
264 gene recently proposed to play a role in SCM, *BAG3*,<sup>46</sup> were carefully examined  
265 for presence of any rare variants in the EqSCM dataset. None of the previously  
266 identified variants,<sup>42; 46</sup> and no other convincing rare variants in these genes,  
267 were detected.

268

### 269 *Cardio-MetaboChip Analysis*

270 To test the possibility of a more complex, polygenetic basis to SCM risk,  
271 involving multiple variants of small effect size, Cardio-MetaboChip analysis was  
272 carried out. The Cardio-MetaboChip data for 27 EqSCM cases and 133 heart-  
273 healthy controls were compared by logistic regression (adjusted for ethnicity and  
274 gender, additive genetic model), first performed for pairwise comparisons across  
275 groups. No SNPs reached statistical significance of <0.05 after adjusting for

276 false discovery rate (FDR) when comparing either the EqSCM and HVOLs, or  
277 the EqSCM and CHD samples. To investigate whether the top 100 of these  
278 SNPs mapped to gene pathways that might assist in understanding potential  
279 disease mechanisms underlying SCM, pathway analysis of the leading 100  
280 SNPs in the EqSCM versus HVOLs pairwise comparison was performed in  
281 MetaCore. Disease Biomarker Pathway analysis identified Myocardial Ischemia  
282 as the third most enriched pathway (FDR-adjusted  $p=1.3e^{-2}$ ), featuring 11 SNP  
283 loci on our list out of 886 pathway objects, including annexin V, ANRIL,  
284 COL4A1, dynein, HXK4, nectin-2, PPAR-gamma, prolidase, Tcf(Lef), UGT, and  
285 VEGFR-2 .

286

### 287 *aCGH Analysis*

288 To test for potential involvement of CNVs in SCM, we applied aCGH to all  
289 cases. Of the 28 EqSCM cases examined by aCGH, twelve (42%) showed  
290 evidence of large, rare heterozygous CNVs classified as being of unclear clinical  
291 significance (Table 2), meaning that insufficient evidence is available for  
292 unequivocal determination of clinical significance.<sup>73</sup> Of these CNVs, seven were  
293 deletions and six were duplications. All of the CNVs were different, and there  
294 was no physical overlap between the various CNVs. Each of these rare CNVs  
295 encompasses one or more genes, or their immediate upstream regulatory  
296 regions, and many of the genes included within the CNVs have functions of  
297 cardiac relevance. A full list of all CNVs detected in the cohort is presented in  
298 Table S1.

299

300 Three cases (EqSCM 01, 06 and 19) harboured deletions very likely to impact  
301 genes of high relevance to cardiomyopathy or cardiac function. In EqSCM 01,  
302 intragenic deletion of *RBFOX1* results in a single copy loss of one exon used by  
303 the majority of transcripts predicted for the gene (Figure 1). This exon contains  
304 the start methionine for the RBFOX1 protein, meaning the gene is most likely  
305 rendered non-functional. *RBFOX1* is an important RNA-binding protein  
306 mediating the incorporation of microexons into many transcripts associated with  
307 neurological patterning and tissue development,<sup>85; 86</sup> particularly in the brain,  
308 heart and muscles. Intragenic deletions in *RBFOX1* have been observed in a  
309 range of conditions, including occasional cases with cardiac defects.<sup>87; 88; 89</sup>  
310 Furthermore, RBFOX1-mediated RNA splicing was also recently shown to be an  
311 important regulator of cardiac hypertrophy and heart failure<sup>90</sup>.

312

313 In the second case (EqSCM 06, Figure. 2), a heterozygous deletion  
314 encompassed exon 2 and the majority of intron 2 of the *Glypican 5 (GPC5)*  
315 locus. *GPC5* encodes a cell surface proteoglycan, which binds to the outer  
316 surface of the plasma membrane in the cardiovascular system and displays  
317 diverse functions including blood vessel formation after ischemic injury and  
318 proliferation of smooth muscle cells during atherogenesis.<sup>91</sup> *GPC5* was also  
319 implicated by GWAS as a protective locus for sudden cardiac arrest,<sup>92</sup> and other  
320 glypicans (*GPC3*, 4 and 6) have been associated with cardiac dysfunction.<sup>93</sup>

321 This case (EqSCM 06) also harbours a duplication on 4q21.21 involving the  
322 *ANXA3* gene, which encodes a member of the annexin family, annexin A3.  
323 Members of this calcium-dependent phospholipid-binding protein family have a  
324 range of functions in the regulation of cellular growth and signal transduction

325 pathways. Annexin A6 for example is the most abundant annexin expressed in  
326 the heart and its overexpression in mice has been shown to cause physiological  
327 alterations in contractility leading to dilated cardiomyopathy, while Annexin A6  
328 knockout has been found to induce faster changes in Ca<sup>2+</sup> transience and  
329 increased contractility.<sup>94; 95</sup> Alterations in expression and activity of annexins A5  
330 and A7 have also been found to be associated with regulation of Ca<sup>2+</sup> handling  
331 in the heart.<sup>96</sup> The function of annexin A3 is not fully understood, however it has  
332 been shown to play a role in endothelial migration and vascular development.<sup>97</sup>  
333

334 The third case (EqSCM 19), contained a deletion at chr13q14.3. This region  
335 harbours at least 10 genes (*DLEU2*, *TRIM13*, *KCNRG*, *MIR16-1*, *MIR15A*,  
336 *DLEU1*, *DLEU1AS-1*, *ST13P4*, *DLEU7AS-1*, *DLEU7*, and *RNASEH2B-AS1*),  
337 including several non-coding RNAs (DLEU genes and micro-RNA genes) and a  
338 gene (*KCNRG*) encoding a protein involved in the regulation of voltage-gated  
339 potassium channel activity. The micro-RNA genes mir-16-1 and mir-15a in this  
340 interval have been implicated in a range of cardiovascular phenotypes, including  
341 a role for mir-15a in postnatal mitotic arrest of cardiomyocytes.<sup>98-100</sup> Two further  
342 chromosome 13 duplicated CNVs of approximately 150kb were classified as  
343 uncertain significance - one involving LINC00346 and ANKRD10 and the other  
344 containing ENOX1, postulated to affect vascular development based on  
345 zebrafish expression patterns<sup>101</sup> (Table 2).

346

347 Beyond these three cases, cardiac or relevant neurological impacts appeared  
348 likely for many of the other rare CNVs identified in EqSCM cases (Table 2,  
349 Figure 2, Table S1), several of which are discussed below.

350

351 A 96kb heterozygous deletion in EqSCM 03 disrupts all predicted transcripts of  
352 the chondrolectin gene (*CHODL*), a membrane bound C-type lectin involved in  
353 muscle organ development, whose protein product is detected in heart and  
354 skeletal muscle by immunohistochemistry.<sup>102</sup> In addition to this CNV, this patient  
355 carries a 1.94Mb duplication at 22q11.25, a locus containing 45 genes or  
356 miRNAs, associated with learning difficulties.<sup>103; 104</sup> This individual, who  
357 exhibited a degree of cognitive impairment, had consented for clinically relevant  
358 findings to be forwarded to their General Practice clinician, who subsequently  
359 recommended genetic counselling for this individual.

360

361 A 455kb duplication within EqSCM 04 at 1p34.1 affects the genes *GPBP1L1*,  
362 *TMEM69*, *IPP*, *MAST2*, and *PIK3R3*. Smaller rare duplications in this region  
363 have been reported by the DGV database<sup>105</sup> but none span the genes within this  
364 CNV. *GPBP1L1* is widely expressed in many tissues, including heart muscle<sup>106</sup>  
365 and predicted to be involved in transcriptional regulation. *TMEM69*, a gene of  
366 unknown function, is most strongly expressed in heart tissue.<sup>106</sup> *IPP* is a  
367 transcription factor with a 50 amino acid Kelch repeat known to interact with  
368 actin, while *MAST2* contains a PDZ domain and is another gene highly  
369 expressed in heart and skeletal muscle.<sup>106</sup> The protein product of *PIK3R3*,  
370 phosphoinositide-3-kinase regulatory subunit 3, acts downstream of G-protein-  
371 coupled receptors in cardiac function,<sup>107</sup> and is also a target for isoproterenol,  
372 which can trigger SCM-like conditions in humans and rodents.<sup>12; 108-110</sup>

373



374 Duplication of a long non-coding RNA (LOC101928358), the 3' segment of  
375 *COL4A5* and the entire *IRS4* gene at Xq22.3 (9 probes, 113kb) was identified  
376 within case EqSCM 05. *IRS4* is an insulin receptor molecule expressed in heart  
377 and skeletal muscle cells<sup>111</sup> and other tissues such as brain, kidney and liver.<sup>112</sup>  
378 Duplication of *IRS4* may be of functional significance, although copy number  
379 increases on the X chromosome of females may be counteracted to a degree by  
380 random X inactivation. Of note is a Genoglyphix Chromosome Aberration  
381 Database (GCAD<sup>70</sup>) case 52414 with a phenotype of low muscle tone, which  
382 has an identical duplication at this locus (as well as a 1p33 deletion). With  
383 regard to *IRS4*, Schreyer et al. (2003)<sup>111</sup> found a more restricted tissue  
384 distribution than *IRS1* and *IRS2*, in primary human skeletal muscle cells and rat  
385 cardiac muscle and isolated cardiomyocytes. Although *IRS4* protein function is  
386 still relatively unknown, the role of IRS proteins in general, acting as mediators  
387 of intracellular signalling from insulin and insulin-like growth factor 1 receptors,  
388 implicates *IRS4* in cell growth and survival.<sup>113</sup> It is interesting to note that PI 3-  
389 kinase (PI3K) signalling in HEH293T cells depends on *IRS4*, and that the IRS  
390 proteins relay signals from receptor tyrosine kinases to downstream  
391 components of signalling pathways,<sup>111</sup> which we note is a connection with the  
392 *PIK3R3* gene duplicated in one of our other cases, EqSCM 04.  
393  
394 EqSCM 10 harboured a 130kb duplication of *NLRP7*, *NLRP2*, *GP6* and *RDH13*  
395 at 19q13.42. One similar DGV duplication has been seen in this area  
396 (nsv1062047<sup>105</sup>), but otherwise duplicated CNVs are generally much smaller  
397 and rare. *NLRP2* and *NLRP7* are genes that encode members of the NACHT,  
398 leucine rich repeat, and PYD containing (NLRP) protein family. These proteins

399 are implicated in the activation of pro-inflammatory caspases. Recessive  
400 mutations in *NLRP2/7* in humans are associated with reproductive  
401 disorders.<sup>114</sup> Another gene in this duplicated cluster associated with disease is  
402 *GP6*, a platelet membrane glycoprotein, involved in collagen-induced platelet  
403 aggregation and thrombus formation, which is expressed at high levels in heart,  
404 kidney and whole blood.<sup>106</sup> A *GP6* SNP (c.13254TC) has been implicated in  
405 recurrent cardiovascular events and mortality.<sup>115</sup> Another study involving this  
406 SNP,<sup>116</sup> found that hormone replacement therapy (HT) reduced the hazard ratio  
407 (HR) of CHD events in patients with the *GP6* 13254TT genotype by 17% but  
408 increased the HR in patients with the TC+CC genotypes by 35% (adjusted  
409 interaction  $P < 0.001$ ). The authors found that in postmenopausal women with  
410 established CHD, the *GP6* polymorphism, and another in *GP1B*, were predictors  
411 of CHD events and significantly modified the effects of HT on CHD risk.<sup>116</sup>  
412  
413 Duplication of *PPL2*, *YPEL1* and *MAPK1* on chromosome 22q11.21 (180kb)  
414 observed in EqsCM 11, does not appear in the DGV catalogue of CNVs in  
415 healthy individuals, and the consequences of overexpression of these genes,  
416 miRNAs or regulatory sequences are unknown. One of the affected genes,  
417 *MAPK1* (previously named *ERK* or *ERK2*), may constitute a link to another  
418 kinase intracellular signalling pathway – the RAF-MEK-ERK kinase cascade,  
419 which in mice and human has an established role in the induction of cardiac  
420 tissue hypertrophy.<sup>117</sup> Although not the kind of left ventricular enlargement seen  
421 in SCM, subtle copy number variation at *MAPK1* may influence signalling  
422 through this pathway. Another duplication in EqsCM 11 involving the 3' half of  
423 *TSPAN7*, a member of the tetraspanin protein superfamily (Xp11.4) was noted

424 as rare, and a similar (though larger) duplication was recently observed in a  
425 patient with Rolandic epilepsy.<sup>118</sup>  
426  
427 An agenic duplication 50kb upstream from *NRG3* (10q23.1) was seen in case  
428 EqSCM 15. This CNV could conceivably disrupt upstream regulatory regions of  
429 *NRG3*, which encodes an important ligand for the transmembrane tyrosine  
430 kinase receptor ERBB4. *NRG3* has been shown to activate tyrosine  
431 phosphorylation of its cognate receptor, ERBB4, and is thought to influence  
432 neuroblast proliferation, migration and differentiation by signalling through  
433 ERBB4. *NRG3* is a strong candidate gene for schizophrenia, and neuregulin  
434 molecules and their receptors are involved in rat cardiac development and  
435 maintenance.<sup>119</sup>

436  
437 Finally, the two rare deletions observed on chromosome 13 (13q21.33 and  
438 13q33.1) in case EqSCM 17, fall into largely uncharacterised areas of the  
439 genome. The first is agenic, although there is a prediction of a spliced EST in  
440 the NCBI database, and the second occurs as two 50kb blocks within the  
441 *ITGBL1* gene. *ITGBL1* is most strongly expressed in aorta.<sup>120; 121</sup>

442  
443

## 444 **Discussion**

### 445 *Monogenic and polygenic models of risk*

446 The Christchurch earthquakes repeatedly exposed the entire population of the  
447 city, approximately 350,000 people, to major stress and life disruption. Almost all  
448 patients presenting with EqSCM were post-menopausal females, consistent with

449 other reports.<sup>122</sup> We set out to explore three categories of genetic contributions  
450 to SCM predisposition, using WES to explore Mendelian models of risk, Cardio-  
451 MetaboChip analysis to test for polygenic risk factors, and aCGH analysis to  
452 evaluate the role of genomic structural variants.

453

454 Extensive analysis of the WES data did not yield any apparent enrichment of  
455 rare, damaging variants within exome regions amongst the EqSCM cases.  
456 Therefore, it seems unlikely that point mutations or small insertion-deletion  
457 (indels) in a single gene underlie predisposition to earthquake SCM. A limitation  
458 of this analysis is that it would have been unable to detect regulatory mutations,  
459 or other important variants, not included or well represented within the captured  
460 exome regions. Whole genome sequencing may therefore be warranted to  
461 further test the hypothesis of Mendelian underpinnings of SCM, as this approach  
462 could identify any regulatory variants not obtained with WES, and due to the  
463 absence of a DNA capture step, would also provide more uniform coverage of  
464 exons.

465

466 In a second approach, we explored the alternative hypothesis of polygenic risk  
467 alleles of small effect size using a case-control association study, with  
468 genotypes generated by the Cardio-MetaboChip. This chip allowed genotyping  
469 of ~200,000 SNPs previously identified through genome - wide association  
470 studies (GWAS) for risk of metabolic, atherosclerotic and cardiovascular  
471 diseases and traits.<sup>123</sup> The traits covered by the panel of genetic variants on the  
472 chip include myocardial infarction (MI) and coronary heart disease (CHD), type 2  
473 diabetes (T2D), T2D age diagnosed, T2D early onset, mean platelet volume,

474 platelet count, white blood cell, HDL cholesterol, LDL cholesterol, triglycerides,  
475 total cholesterol, body mass index, waist hip ratio (BMI adjusted), waist  
476 circumference (BMI adjusted), height, percent fat mass, fasting glucose, fasting  
477 insulin, 2-hour glucose, HbA1c, systolic blood pressure, diastolic blood pressure  
478 and QT interval. This analysis did not yield variants of genome-wide  
479 significance in the SCM cases compared to either healthy controls or patients  
480 with coronary disease. Exploratory pathway analysis suggested that the EqSCM  
481 cases carried a greater burden of SNPs that mapped to a myocardial ischemia  
482 pathway compared to the healthy controls, although this must be interpreted  
483 with caution as our small sample set meant very limited statistical power. Two  
484 limitations of this analysis were the relatively constrained content of the Cardio-  
485 MetaboChip, which is less able to provide a rich dataset of genome-wide SNP  
486 genotypes than the chips commonly used for GWAS, and the relatively small  
487 cohort of cases available for study. Recruitment of a much larger SCM cohort  
488 with a view to a well-powered GWAS with a more extensive genotyping chip  
489 would therefore be a worthwhile future goal to more fully explore possible  
490 polygenic underpinnings of this disorder. We note the recent publication of a  
491 preliminary GWAS on 96 SCM cases and 475 healthy controls,<sup>124</sup> and believe  
492 extension of this approach to larger cohorts is an important goal.

493

#### 494 *Involvement of copy number variants*

495 CNVs have been implicated in many diseases since the recognition a decade  
496 ago of their widespread distribution through the genome.<sup>125-127</sup> Of note, rare  
497 CNVs are implicated in autism, epilepsy, schizophrenia, developmental delay  
498 and intellectual disability.<sup>105; 128-132</sup> Cardiac conditions which involve CNVs

499 include congenital left-sided heart disease,<sup>133; 134</sup> congenital heart disease,<sup>135; 136</sup>  
500 some cases of long QT syndrome,<sup>137</sup> and Tetralogy of Fallot.<sup>138</sup> Our final  
501 analysis, therefore, was to explore the potential involvement of CNV in risk of  
502 EqSCM, using aCGH analysis of all cases. Results from this analysis were  
503 striking, with 42% of EqSCM cases having a rare CNV of unclear clinical  
504 significance. The CNV detection rate for diagnostic aCGH in childhood  
505 developmental disorders such as autism, developmental delay and intellectual  
506 disabilities, is approximately 20-30%.<sup>139-141</sup> A recent report of a large New  
507 Zealand aCGH case series (5,300 pre- and post-natal tests) reported CNVs in  
508 28.3% of these clinically-selected cases.<sup>142</sup> Our observation of a rate of 42% for  
509 the EqSCM case series is significantly greater ( $P < 0.02$ ) than rates for the  
510 enriched case cohorts normally referred for clinical aCGH testing<sup>139-142</sup>. The  
511 CNVs detected in EqSCM cases were all different, and there were no physical  
512 overlaps between them. This situation is similar to the pattern of CNVs seen in  
513 other conditions, including rolandic epilepsies<sup>118</sup> and congenital heart  
514 disease.<sup>133; 135; 136</sup> Many of the CNVs we observed are likely to impact genes of  
515 potential relevance to physiological processes implicated in SCM.  
516  
517 We have taken a relatively conservative approach to categorising CNVs, in  
518 terms of rarity and predicted functional significance. For example, we did not  
519 include two CNVs located at 9p24.3, involving individuals EqSCM 14 and 28 - a  
520 deletion and duplication, respectively. These CNVs encompassed a region  
521 including the large isoform of *DOCK8* gene. *DOCK8* encodes a protein  
522 implicated in the regulation of the actin cytoskeleton,<sup>143</sup> and *DOCK8* mutations  
523 cause autosomal recessive hyper-IgE syndrome.<sup>144</sup> One reported case of a

524 homozygous 129kb deletion in this region was associated with Graves's disease  
525 and aortic aneurysm.<sup>145</sup> However, several deletions of *DOCK8* are recorded in  
526 the DGV for unaffected individuals, therefore the CNVs in EqSCM 14 and 28  
527 were categorised as TBB (thought to be benign). The approximately 160kb  
528 duplication in EqSCM 28 was larger than the 44kb deletion in EqSCM 14, and it  
529 encompassed a second gene, *KANK1*. A small number of similar duplications  
530 have been recorded in the DGV, and therefore we did not consider this to be  
531 pathogenic. However, it is of interest that we see two relatively rare CNVs at this  
532 locus in our small EqSCM cohort.

533

534 Of the twelve EqSCM cases with rare CNVs, we consider that three (EqSCM 01,  
535 06 and 19) contain CNVs that affect genes of high relevance to cardiomyopathy  
536 or cardiac function. The remaining candidate CNVs are also strong candidates  
537 with potential functional relevance. In one of our most highly-ranked candidate  
538 CNV containing cases (EqSCM 01) a large genomic deletion removes an exon  
539 of *RBFox1* which contains the start codon used by the majority of transcripts  
540 predicted for the gene. A recent report by Gao *et al.* (2016) provided strong  
541 functional data that would support our hypothesis of this gene's involvement as  
542 a susceptibility locus for SCM<sup>90</sup>. Their work with mouse models has shown  
543 *RBFox1* deficiency in the heart promoted pressure overload-induced heart  
544 failure, and induction of *RBFox1* over-expression in these murine pressure-  
545 overload models, substantially attenuated cardiac hypertrophy and pathological  
546 manifestations<sup>90</sup>. The haploinsufficiency seen in EqSCM 01 at the *RBFox1*  
547 locus may, in concert with other environmental or genetic factors, contribute to  
548 SCM through reduced global RNA splicing changes in the heart.

549 **Conclusion**

550 Beginning with a cohort of 28 SCM cases triggered by two major earthquakes  
551 that caused extensive death and damage in Christchurch (New Zealand), we  
552 carried out exploratory analyses of three models for genetic predisposition to  
553 this disorder. Using WES and Cardio-MetaboChip genotyping analyses we did  
554 not detect an obvious role for exonic mutations in a monogenic model, or SNPs  
555 in a polygenic model, for SCM risk. However, our analysis of copy number  
556 variation in SCM cases revealed a high rate of occurrence of CNV categorised  
557 as of uncertain clinical significance. Most of the CNV we detected in SCM cases  
558 were rare, or not previously seen (Table 2).

559

560 These observations lead us to propose that SCM is a copy number variant  
561 disorder, whereby haploinsufficiency of genes overlapping deletions or over-  
562 expression of duplicated genes leads to relatively subtle modification of cardiac  
563 or adrenergic physiology, such that these individuals are at increased risk of  
564 suffering SCM when exposed to specific environmental triggers. Although no  
565 obvious single pathway relationships between the genes affected by these  
566 CNVs is apparent, most of the CNVs encompass loci relevant to cardiac  
567 function or cardioneuronal development.

568

569 In order to confirm whether SCM predisposition does indeed arise from CNVs,  
570 four key areas for future work need to be pursued. First, more widespread  
571 analysis is required of CNVs in many SCM cases. This would confirm whether  
572 our observation of a high rate of CNV in EqSCM also prevails in sporadic cases,  
573 and it will broaden the catalog of affected genes, helping to discern underlying



574 signalling networks and physiological processes. In addition, with increasing  
575 numbers of cases, physical overlaps between CNVs in different individuals  
576 should become apparent, pinpointing key genomic regions for more intensive  
577 analysis. Second, the inheritance patterns of these CNVs must be established. It  
578 is unclear what proportion are *de novo* versus inherited from either parent.  
579 Third, there is a clear need for detailed physiological and gene expression  
580 analyses on appropriate cells, including cardiomyocytes, derived from SCM  
581 cases. Given the diversity of CNV seen in our SCM cases, this goal would most  
582 effectively be achieved by generation of induced-pluripotent stem cell (iPSC)  
583 lines from many patients and appropriate controls.<sup>146; 147</sup> Finally, although our  
584 data implicate CNV as a significant genetic factor underlying SCM risk, it would  
585 seem wise to pursue an effective GWAS strategy to identify other genetic  
586 contributors to SCM and build on the initial study in this area.<sup>124</sup> International  
587 initiatives to collate SCM cases<sup>13</sup> should therefore ensure that consented DNA is  
588 available to provide appropriately large numbers of well phenotyped cases and  
589 controls to facilitate this goal.

590

591 Finally, we hope our observations implicating CNV in this unique case series of  
592 EqSCM will stimulate further studies of copy number variation in other SCM  
593 cohorts, and lead to an improved understanding of this perplexing and intriguing  
594 condition.

595

## 596 **Supplemental Data**

597 Supplemental Data include one figure and one table and can be found with this  
598 article online at....

599

600 **Acknowledgements**

601 This study was supported by an Earthquake research grant jointly awarded by  
602 the Health Research Council of New Zealand and Canterbury Medical Research  
603 Foundation. This study makes use of data generated by the DECIPHER  
604 community. A full list of centres who contributed to the generation of the data is  
605 available from <http://decipher.sanger.ac.uk> and via email from  
606 [decipher@sanger.ac.uk](mailto:decipher@sanger.ac.uk). Funding for the project was provided by the Wellcome  
607 Trust. We thank all participants for their agreement to be involved in this study,  
608 and Alan Aitchison and Allison Miller for preparation of DNA samples and  
609 Sanger sequencing analyses.

610

611

612 **Web Resources**

- 613 1000 Genomes project, <http://www.internationalgenome.org/>
- 614 ClinVar, <https://www.ncbi.nlm.nih.gov/clinvar/>
- 615 Database of Genomic Variation (DGV), <http://dgv.tcag.ca/dgv/app/home>
- 616 DECIPHER, <https://decipher.sanger.ac.uk/>
- 617 Exome Aggregation Consortium (ExAC), <http://exac.broadinstitute.org>
- 618 Galaxy, <https://galaxyproject.org/>
- 619 GTex, <https://www.gtexportal.org/home/>
- 620 HUGO Gene Nomenclature Committee, <http://www.genenames.org>
- 621 MutationTaster2, <http://www.mutationtaster.org/>
- 622 NHLBI GO Exome Sequencing Project (ESP),
- 623 <https://esp.gs.washington.edu/drupal/>
- 624 SeattleSeq annotation server, <http://evs.gs.washington.edu/EVS/>
- 625

## 626 References

627

628 1. Dote, K., Sato, H., Tateishi, H., Uchida, T., and Ishihara, M. (1991). [Myocardial  
629 stunning due to simultaneous multivessel coronary spasms: a review of 5  
630 cases]. *J Cardiol* 21, 203-214.

631 2. Tsuchihashi, K., Ueshima, K., Uchida, T., Oh-mura, N., Kimura, K., Owa, M.,  
632 Yoshiyama, M., Miyazaki, S., Haze, K., Ogawa, H., et al. (2001). Transient left  
633 ventricular apical ballooning without coronary artery stenosis: a novel heart  
634 syndrome mimicking acute myocardial infarction. *Angina Pectoris-*  
635 *Myocardial Infarction Investigations in Japan. Journal of the American*  
636 *College of Cardiology* 38, 11-18.

637 3. Sharkey, S.W. (2013). Takotsubo cardiomyopathy: natural history. *Heart Fail Clin*  
638 9, 123-136, vii.

639 4. Sharkey, S.W., Windenburg, D.C., Lesser, J.R., Maron, M.S., Hauser, R.G., Lesser,  
640 J.N., Haas, T.S., Hodges, J.S., and Maron, B.J. (2010). Natural history and  
641 expansive clinical profile of stress (tako-tsubo) cardiomyopathy. *J Am Coll*  
642 *Cardiol* 55, 333-341.

643 5. Eshtehardi, P., Koestner, S.C., Adorjan, P., Windecker, S., Meier, B., Hess, O.M.,  
644 Wahl, A., and Cook, S. (2009). Transient apical ballooning syndrome--clinical  
645 characteristics, ballooning pattern, and long-term follow-up in a Swiss  
646 population. *Int J Cardiol* 135, 370-375.

647 6. Watanabe, H., Kodama, M., Okura, Y., Aizawa, Y., Tanabe, N., Chinushi, M.,  
648 Nakamura, Y., Nagai, T., Sato, M., and Okabe, M. (2005). Impact of  
649 Earthquakes on Takotsubo Cardiomyopathy. *Jama* 294, 305-307.

650 7. Strunk, B., Shaw, R.E., Bull, S., Adams, J., Baer, M., Gershengorn, K., Kao, A., Keeffe,  
651 B., Sklar, J., Sperling, D., et al. (2006). High incidence of focal left ventricular  
652 wall motion abnormalities and normal coronary arteries in patients with  
653 myocardial infarctions presenting to a community hospital. *The Journal of*  
654 *invasive cardiology* 18, 376-381.

655 8. Sy, F., Basraon, J., Zheng, H., Singh, M., Richina, J., and Ambrose, J.A. (2013).  
656 Frequency of Takotsubo cardiomyopathy in postmenopausal women  
657 presenting with an acute coronary syndrome. *Am J Cardiol* 112, 479-482.

658 9. Eitel, I., von Knobelsdorff-Brenkenhoff, F., Bernhardt, P., Carbone, I., Muellerleile,  
659 K., Aldrovandi, A., Francone, M., Desch, S., Gutberlet, M., Strohm, O., et al.  
660 (2011). Clinical characteristics and cardiovascular magnetic resonance  
661 findings in stress (takotsubo) cardiomyopathy. *JAMA* 306, 277-286.

662 10. Prasad, A., Dangas, G., Srinivasan, M., Yu, J., Gersh, B.J., Mehran, R., and Stone,  
663 G.W. (2014). Incidence and angiographic characteristics of patients with  
664 apical ballooning syndrome (takotsubo/stress cardiomyopathy) in the  
665 HORIZONS-AMI trial: an analysis from a multicenter, international study of  
666 ST-elevation myocardial infarction. *Catheter Cardiovasc Interv* 83, 343-348.

667 11. Deshmukh, A., Kumar, G., Pant, S., Rihal, C., Murugiah, K., and Mehta, J.L. (2012).  
668 Prevalence of Takotsubo cardiomyopathy in the United States. *American*  
669 *heart journal* 164, 66-71 e61.

670 12. Wright, P.T., Tranter, M.H., Morley-Smith, A.C., and Lyon, A.R. (2014).  
671 Pathophysiology of takotsubo syndrome: temporal phases of cardiovascular  
672 responses to extreme stress. *Circ J* 78, 1550-1558.

673 13. Templin, C., Ghadri, J.R., Diekmann, J., Napp, L.C., Bataiosu, D.R., Jaguszewski, M.,  
674 Cammann, V.L., Sarcon, A., Geyer, V., Neumann, C.A., et al. (2015). Clinical

- 675           Features and Outcomes of Takotsubo (Stress) Cardiomyopathy. *N Engl J Med*  
676           373, 929-938.
- 677   14. Steptoe, A. (2009). The impact of natural disasters on myocardial infarction.  
678           *Heart* 95, 1972-1973.
- 679   15. Butterly, S.J., Indrajith, M., Garrahy, P., Ng, A.C., Gould, P.A., and Wang, W.Y.  
680           (2013). Stress-induced takotsubo cardiomyopathy in survivors of the 2011  
681           Queensland floods. *Med J Aust* 198, 109-110.
- 682   16. Leor, J., Poole, W.K., and Kloner, R.A. (1996). Sudden cardiac death triggered by  
683           an earthquake. *N Engl J Med* 334, 413-419.
- 684   17. Aoki, T., Takahashi, J., Fukumoto, Y., Yasuda, S., Ito, K., Miyata, S., Shinozaki, T.,  
685           Inoue, K., Yagi, T., Komaru, T., et al. (2013). Effect of the Great East Japan  
686           Earthquake on cardiovascular diseases--report from the 10 hospitals in the  
687           disaster area. *Circ J* 77, 490-493.
- 688   18. Bridgman, P.G., Finsterer, J., Lacey, C., Kimber, B., Parkin, P.J., Miller, A.L., and  
689           Kennedy, M.A. (2016). CTG-repeat expansions in the DMPK gene do not  
690           cause takotsubo syndrome. *Int J Cardiol* 203, 107-108.
- 691   19. Lacey, C., Mulder, R., Bridgman, P., Kimber, B., Zarifeh, J., Kennedy, M., and  
692           Cameron, V. (2014). Broken heart syndrome - is it a psychosomatic  
693           disorder? *J Psychosom Res* 77, 158-160.
- 694   20. Chan, C., Elliott, J., Troughton, R., Frampton, C., Smyth, D., Crozier, I., and  
695           Bridgman, P. (2013). Acute myocardial infarction and stress  
696           cardiomyopathy following the Christchurch earthquakes. *PLoS One* 8,  
697           e68504.
- 698   21. Chan, C., Troughton, R., Elliott, J., Zarifeh, J., and Bridgman, P. (2014). One-year  
699           follow-up of the 2011 Christchurch Earthquake stress cardiomyopathy  
700           cases. *N Z Med J* 127, 15-22.
- 701   22. Bridgman, P.G., Chan, C.W., and Elliott, J.M. (2012). A case of recurrent  
702           earthquake stress cardiomyopathy with a differing wall motion abnormality.  
703           *Echocardiography* 29, E26-27.
- 704   23. Zarifeh, J.A., Mulder, R.T., Kerr, A.J., Chan, C.W., and Bridgman, P.G. (2012).  
705           Psychology of earthquake-induced stress cardiomyopathy, myocardial  
706           infarction and non-cardiac chest pain. *Intern Med J* 42, 369-373.
- 707   24. Wittstein, I.S. (2012). Stress cardiomyopathy: a syndrome of catecholamine-  
708           mediated myocardial stunning? *Cell Mol Neurobiol* 32, 847-857.
- 709   25. Coupez, E., Eschalier, R., Pereira, B., Pierrard, R., Souteyrand, G., Clerfond, G.,  
710           Citron, B., Lussion, J.R., Mansencal, N., and Motreff, P. (2014). A single  
711           pathophysiological pathway in Takotsubo cardiomyopathy:  
712           Catecholaminergic stress. *Arch Cardiovasc Dis* 107, 245-252.
- 713   26. Wittstein, I.S. (2012). Stress cardiomyopathy: a syndrome of catecholamine-  
714           mediated myocardial stunning? *Cell Mol Neurobiol* 32, 847-857.
- 715   27. Wittstein, I.S., Thiemann, D.R., Lima, J.A., Baughman, K.L., Schulman, S.P.,  
716           Gerstenblith, G., Wu, K.C., Rade, J.J., Bivalacqua, T.J., and Champion, H.C.  
717           (2005). Neurohumoral features of myocardial stunning due to sudden  
718           emotional stress. *N Engl J Med* 352, 539-548.
- 719   28. Nef, H.M., Mollmann, H., Kostin, S., Troidl, C., Voss, S., Weber, M., Dill, T., Rolf, A.,  
720           Brandt, R., Hamm, C.W., et al. (2007). Tako-Tsubo cardiomyopathy:  
721           intraindividual structural analysis in the acute phase and after functional  
722           recovery. *Eur Heart J* 28, 2456-2464.

- 723 29. Prasad, A., Lerman, A., and Rihal, C.S. (2008). Apical ballooning syndrome  
724 (Tako-Tsubo or stress cardiomyopathy): a mimic of acute myocardial  
725 infarction. *Am Heart J* 155, 408-417.
- 726 30. Summers, M.R., Lennon, R.J., and Prasad, A. (2010). Pre-morbid psychiatric and  
727 cardiovascular diseases in apical ballooning syndrome (tako-tsubo/stress-  
728 induced cardiomyopathy): potential pre-disposing factors? *J Am Coll Cardiol*  
729 55, 700-701.
- 730 31. Wright, P.T., Tranter, M.H., Morley-Smith, A.C., and Lyon, A.R. (2014).  
731 Pathophysiology of takotsubo syndrome. *Circ J* 78, 1550-1558.
- 732 32. Nef, H.M., Mollmann, H., Akashi, Y.J., and Hamm, C.W. (2010). Mechanisms of  
733 stress (Takotsubo) cardiomyopathy. *Nat Rev Cardiol* 7, 187-193.
- 734 33. Maron, B.J., Maron, M.S., and Semsarian, C. (2012). Genetics of hypertrophic  
735 cardiomyopathy after 20 years: clinical perspectives. *J Am Coll Cardiol* 60,  
736 705-715.
- 737 34. McNally, E.M., Golbus, J.R., and Puckelwartz, M.J. (2013). Genetic mutations and  
738 mechanisms in dilated cardiomyopathy. *J Clin Invest* 123, 19-26.
- 739 35. Musumeci, B., Saponaro, A., Pagannone, E., Proietti, G., Mastromarino, V., Conti,  
740 E., Tubaro, M., Volpe, M., and Autore, C. (2013). Simultaneous Takotsubo  
741 syndrome in two sisters. *Int J Cardiol* 165, e49-50.
- 742 36. Ikutomi, M., Yamasaki, M., Matsusita, M., Watari, Y., Arashi, H., Endo, G.,  
743 Yamaguchi, J., and Ohnishi, S. (2014). Takotsubo cardiomyopathy in siblings.  
744 *Heart Vessels* 29, 119-122.
- 745 37. Pison, L., De Vusser, P., and Mullens, W. (2004). Apical ballooning in relatives.  
746 *Heart* 90, e67.
- 747 38. Sharkey, S.W., Lips, D.L., Pink, V.R., and Maron, B.J. (2013). Daughter-mother  
748 tako-tsubo cardiomyopathy. *Am J Cardiol* 112, 137-138.
- 749 39. Cherian, J., Angelis, D., Filiberti, A., and Saperia, G. (2007). Can takotsubo  
750 cardiomyopathy be familial? *Int J Cardiol* 121, 74-75.
- 751 40. Kumar, G., Holmes, D.R., Jr., and Prasad, A. (2010). "Familial" apical ballooning  
752 syndrome (Takotsubo cardiomyopathy). *Int J Cardiol* 144, 444-445.
- 753 41. Subban, V., Ramachandran, S., Victor, S.M., Gnanaraj, A., and Ajit, M.S. (2012).  
754 Apical ballooning syndrome in first degree relatives. *Indian Heart J* 64, 607-  
755 609.
- 756 42. Goodloe, A.H., Evans, J.M., Middha, S., Prasad, A., and Olson, T.M. (2014).  
757 Characterizing genetic variation of adrenergic signalling pathways in  
758 Takotsubo (stress) cardiomyopathy exomes. *Eur J Heart Fail* 16, 942-949.
- 759 43. Schultz, T., Shao, Y., Redfors, B., Sverrisdottir, Y.B., Ramunddal, T., Albertsson, P.,  
760 Matejka, G., and Omerovic, E. (2012). Stress-induced cardiomyopathy in  
761 Sweden: evidence for different ethnic predisposition and altered cardio-  
762 circulatory status. *Cardiology* 122, 180-186.
- 763 44. Pilgrim, T.M., and Wyss, T.R. (2008). Takotsubo cardiomyopathy or transient  
764 left ventricular apical ballooning syndrome: A systematic review. *Int J*  
765 *Cardiol* 124, 283-292.
- 766 45. Limongelli, G., D'Alessandro, R., Masarone, D., Maddaloni, V., Vriz, O., Minisini, R.,  
767 Citro, R., Calabro, P., Russo, M.G., Calabro, R., et al. (2013). Takotsubo  
768 cardiomyopathy: do the genetics matter? *Heart Fail Clin* 9, 207-216, ix.
- 769 46. d'Avenia, M., Citro, R., De Marco, M., Veronese, A., Rosati, A., Visone, R., Leptidis,  
770 S., Philippen, L., Vitale, G., Cavallo, A., et al. (2015). A novel miR-371a-5p-  
771 mediated pathway, leading to BAG3 upregulation in cardiomyocytes in

- 772 response to epinephrine, is lost in Takotsubo cardiomyopathy. *Cell death &*  
773 *disease* 6, e1948.
- 774 47. Figtree, G.A., Bagnall, R.D., Abdulla, I., Buchholz, S., Galougahi, K.K., Yan, W., Tan,  
775 T., Neil, C., Horowitz, J.D., Semsarian, C., et al. (2013). No association of G-  
776 protein-coupled receptor kinase 5 or beta-adrenergic receptor  
777 polymorphisms with Takotsubo cardiomyopathy in a large Australian  
778 cohort. *Eur J Heart Fail* 15, 730-733.
- 779 48. Sharkey, S.W., Maron, B.J., Nelson, P., Parpart, M., Maron, M.S., and Bristow, M.R.  
780 (2009). Adrenergic receptor polymorphisms in patients with stress (tako-  
781 tsubo) cardiomyopathy. *J Cardiol* 53, 53-57.
- 782 49. Handy, A.D., Prasad, A., and Olson, T.M. (2009). Investigating genetic variation  
783 of adrenergic receptors in familial stress cardiomyopathy (apical ballooning  
784 syndrome). *Journal of cardiology* 54, 516-517.
- 785 50. Spinelli, L., Trimarco, V., Di Marino, S., Marino, M., Iaccarino, G., and Trimarco, B.  
786 (2010). L41Q polymorphism of the G protein coupled receptor kinase 5 is  
787 associated with left ventricular apical ballooning syndrome. *European*  
788 *journal of heart failure* 12, 13-16.
- 789 51. Vriza, O., Minisini, R., Citro, R., Guerra, V., Zito, C., De Luca, G., Pavan, D., Pirisi, M.,  
790 Limongelli, G., and Bossone, E. (2011). Analysis of beta1 and beta2-  
791 adrenergic receptors polymorphism in patients with apical ballooning  
792 cardiomyopathy. *Acta Cardiol* 66, 787-790.
- 793 52. Novo, G., Giambanco, S., Guglielmo, M., Arvigo, L., Sutera, M.R., Giambanco, F.,  
794 Evola, S., Vaccarino, L., Bova, M., Lio, D., et al. (2014). G-protein-coupled  
795 receptor kinase 5 polymorphism and Takotsubo cardiomyopathy. *J*  
796 *Cardiovasc Med (Hagerstown)*.
- 797 53. Munafo, M.R., and Flint, J. (2004). Meta-analysis of genetic association studies.  
798 *Trends Genet* 20, 439-444.
- 799 54. Pizzino, G., Bitto, A., Crea, P., Khandheria, B., Vriza, O., Carerj, S., Squadrito, F.,  
800 Minisini, R., Citro, R., Cusma-Piccione, M., et al. (2017). Takotsubo syndrome  
801 and estrogen receptor genes: partners in crime? *J Cardiovasc Med*  
802 *(Hagerstown)* 18, 268-276.
- 803 55. Ng, S.B., Turner, E.H., Robertson, P.D., Flygare, S.D., Bigham, A.W., Lee, C.,  
804 Shaffer, T., Wong, M., Bhattacharjee, A., Eichler, E.E., et al. (2009). Targeted  
805 capture and massively parallel sequencing of 12 human exomes. *Nature* 461,  
806 272-276.
- 807 56. Bamshad, M.J., Ng, S.B., Bigham, A.W., Tabor, H.K., Emond, M.J., Nickerson, D.A.,  
808 and Shendure, J. (2011). Exome sequencing as a tool for Mendelian disease  
809 gene discovery. *Nature reviews Genetics* 12, 745-755.
- 810 57. Yang, Y., Muzny, D.M., Reid, J.G., Bainbridge, M.N., Willis, A., Ward, P.A., Braxton,  
811 A., Beuten, J., Xia, F., Niu, Z., et al. (2013). Clinical whole-exome sequencing  
812 for the diagnosis of mendelian disorders. *N Engl J Med* 369, 1502-1511.
- 813 58. Chugh, S.S., and Huertas-Vazquez, A. (2014). Inherited arrhythmia syndromes:  
814 exome sequencing opens a new door to diagnosis. *J Am Coll Cardiol* 63, 267-  
815 268.
- 816 59. Li, H., and Durbin, R. (2009). Fast and accurate short read alignment with  
817 Burrows-Wheeler transform. *Bioinformatics* 25, 1754-1760.
- 818 60. McKenna, A., Hanna, M., Banks, E., Sivachenko, A., Cibulskis, K., Kernytsky, A.,  
819 Garimella, K., Altshuler, D., Gabriel, S., Daly, M., et al. (2010). The Genome

- 820 Analysis Toolkit: a MapReduce framework for analyzing next-generation  
821 DNA sequencing data. *Genome research* 20, 1297-1303.
- 822 61. Schwarz, J.M., Cooper, D.N., Schuelke, M., and Seelow, D. (2014).  
823 MutationTaster2: mutation prediction for the deep-sequencing age. *Nat*  
824 *Methods* 11, 361-362.
- 825 62. Cingolani, P., Platts, A., Wang le, L., Coon, M., Nguyen, T., Wang, L., Land, S.J., Lu,  
826 X., and Ruden, D.M. (2012). A program for annotating and predicting the  
827 effects of single nucleotide polymorphisms, SnpEff: SNPs in the genome of  
828 *Drosophila melanogaster* strain w1118; iso-2; iso-3. *Fly (Austin)* 6, 80-92.
- 829 63. Goecks, J., Nekrutenko, A., Taylor, J., and Galaxy, T. (2010). Galaxy: a  
830 comprehensive approach for supporting accessible, reproducible, and  
831 transparent computational research in the life sciences. *Genome Biol* 11,  
832 R86.
- 833 64. Durbin, R.M., Abecasis, G.R., Altshuler, D.L., Auton, A., Brooks, L.D., Gibbs, R.A.,  
834 Hurles, M.E., and McVean, G.A. (2010). A map of human genome variation  
835 from population-scale sequencing. *Nature* 467, 1061-1073.
- 836 65. Landrum, M.J., Lee, J.M., Riley, G.R., Jang, W., Rubinstein, W.S., Church, D.M., and  
837 Maglott, D.R. (2014). ClinVar: public archive of relationships among  
838 sequence variation and human phenotype. *Nucleic Acids Res* 42, D980-985.
- 839 66. Ellis, K.L., Frampton, C.M., Pilbrow, A.P., Troughton, R.W., Doughty, R.N.,  
840 Whalley, G.A., Ellis, C.J., Skelton, L., Thomson, J., Yandle, T.G., et al. (2011).  
841 Genomic risk variants at 1p13.3, 1q41, and 3q22.3 are associated with  
842 subsequent cardiovascular outcomes in healthy controls and in established  
843 coronary artery disease. *Circ Cardiovasc Genet* 4, 636-646.
- 844 67. Purcell, S., Neale, B., Todd-Brown, K., Thomas, L., Ferreira, M.A., Bender, D.,  
845 Maller, J., Sklar, P., de Bakker, P.I., Daly, M.J., et al. (2007). PLINK: a tool set  
846 for whole-genome association and population-based linkage analyses. *Am J*  
847 *Hum Genet* 81, 559-575.
- 848 68. Team, R.C. (2016). R: A language and environment for statistical computing. (R  
849 Foundation for Statistical Computing, Vienna, Austria).
- 850 69. Benjamini, Y., and Yekutieli, D. (2001). The control of the false discovery rate in  
851 multiple testing under dependency. *Ann Stat* 29, 1165-1188.
- 852 70. Neill, N.J., Torchia, B.S., Bejjani, B.A., Shaffer, L.G., and Ballif, B.C. (2010).  
853 Comparative analysis of copy number detection by whole-genome BAC and  
854 oligonucleotide array CGH. *Molecular cytogenetics* 3, 11.
- 855 71. Firth, H.V., Richards, S.M., Bevan, A.P., Clayton, S., Corpas, M., Rajan, D., Van  
856 Vooren, S., Moreau, Y., Pettett, R.M., and Carter, N.P. (2009). DECIPHER:  
857 Database of Chromosomal Imbalance and Phenotype in Humans Using  
858 Ensembl Resources. *Am J Hum Genet* 84, 524-533.
- 859 72. MacDonald, J.R., Ziman, R., Yuen, R.K., Feuk, L., and Scherer, S.W. (2014). The  
860 Database of Genomic Variants: a curated collection of structural variation in  
861 the human genome. *Nucleic Acids Res* 42, D986-992.
- 862 73. Kearney, H.M., Thorland, E.C., Brown, K.K., Quintero-Rivera, F., South, S.T., and  
863 Working Group of the American College of Medical Genetics Laboratory  
864 Quality Assurance, C. (2011). American College of Medical Genetics  
865 standards and guidelines for interpretation and reporting of postnatal  
866 constitutional copy number variants. *Genet Med* 13, 680-685.
- 867 74. Riggs, E.R., Church, D.M., Hanson, K., Horner, V.L., Kaminsky, E.B., Kuhn, R.M.,  
868 Wain, K.E., Williams, E.S., Aradhya, S., Kearney, H.M., et al. (2012). Towards



- 869 an evidence-based process for the clinical interpretation of copy number  
870 variation. *Clin Genet* 81, 403-412.
- 871 75. Hanemaaijer, N.M., Sikkema-Raddatz, B., van der Vries, G., Dijkhuizen, T.,  
872 Hordijk, R., van Essen, A.J., Veenstra-Knol, H.E., Kerstjens-Frederikse, W.S.,  
873 Herkert, J.C., Gerkes, E.H., et al. (2012). Practical guidelines for interpreting  
874 copy number gains detected by high-resolution array in routine diagnostics.  
875 *Eur J Hum Genet* 20, 161-165.
- 876 76. Breckpot, J., Thienpont, B., Arens, Y., Tranchevent, L.C., Vermeesch, J.R., Moreau,  
877 Y., Gewillig, M., and Devriendt, K. (2011). Challenges of interpreting copy  
878 number variation in syndromic and non-syndromic congenital heart defects.  
879 *Cytogenet Genome Res* 135, 251-259.
- 880 77. Mills, R.E., Walter, K., Stewart, C., Handsaker, R.E., Chen, K., Alkan, C., Abyzov, A.,  
881 Yoon, S.C., Ye, K., Cheetham, R.K., et al. (2011). Mapping copy number  
882 variation by population-scale genome sequencing. *Nature* 470, 59-65.
- 883 78. Cooper, G.M., Coe, B.P., Girirajan, S., Rosenfeld, J.A., Vu, T.H., Baker, C., Williams,  
884 C., Stalker, H., Hamid, R., Hannig, V., et al. (2011). A copy number variation  
885 morbidity map of developmental delay. *Nat Genet* 43, 838-846.
- 886 79. Coe, B.P., Witherspoon, K., Rosenfeld, J.A., van Bon, B.W., Vulto-van Silfhout, A.T.,  
887 Bosco, P., Friend, K.L., Baker, C., Buono, S., Vissers, L.E., et al. (2014). Refining  
888 analyses of copy number variation identifies specific genes associated with  
889 developmental delay. *Nat Genet* 46, 1063-1071.
- 890 80. Shaikh, T.H., Gai, X., Perin, J.C., Glessner, J.T., Xie, H., Murphy, K., O'Hara, R.,  
891 Casalunovo, T., Conlin, L.K., D'Arcy, M., et al. (2009). High-resolution  
892 mapping and analysis of copy number variations in the human genome: a  
893 data resource for clinical and research applications. *Genome Res* 19, 1682-  
894 1690.
- 895 81. Vogler, C., Gschwind, L., Rothlisberger, B., Huber, A., Filges, I., Miny, P., Auschra,  
896 B., Stetak, A., Demougin, P., Vukojevic, V., et al. (2010). Microarray-based  
897 maps of copy-number variant regions in European and sub-Saharan  
898 populations. *PLoS One* 5, e15246.
- 899 82. Kircher, M., Witten, D.M., Jain, P., O'Roak, B.J., Cooper, G.M., and Shendure, J.  
900 (2014). A general framework for estimating the relative pathogenicity of  
901 human genetic variants. *Nat Genet* 46, 310-315.
- 902 83. Picardi, E., and Pesole, G. (2012). Mitochondrial genomes gleaned from human  
903 whole-exome sequencing. *Nat Methods* 9, 523-524.
- 904 84. Chua, E.W., Cree, S., Barclay, M.L., Doudney, K., Lehnert, K., Aitchison, A., and  
905 Kennedy, M.A. (2015). Exome sequencing and array-based comparative  
906 genomic hybridisation analysis of preferential 6-methylmercaptopyrimidine  
907 producers. *Pharmacogenomics J* In press.
- 908 85. Li, Y.I., Sanchez-Pulido, L., Haerty, W., and Ponting, C.P. (2015). RBFox and  
909 PTBP1 proteins regulate the alternative splicing of micro-exons in human  
910 brain transcripts. *Genome Res* 25, 1-13.
- 911 86. Irimia, M., Weatheritt, R.J., Ellis, J.D., Parikshak, N.N., Gonatopoulos-Pournatzis,  
912 T., Babor, M., Quesnel-Vallieres, M., Tapial, J., Raj, B., O'Hanlon, D., et al.  
913 (2014). A highly conserved program of neuronal microexons is misregulated  
914 in autistic brains. *Cell* 159, 1511-1523.
- 915 87. Zhao, W.W. (2013). Intragenic deletion of RBFox1 associated with  
916 neurodevelopmental/neuropsychiatric disorders and possibly other clinical  
917 presentations. *Molecular cytogenetics* 6, 26.

- 918 88. Lale, S., Yu, S., and Ahmed, A. (2011). Complex congenital heart defects in  
919 association with maternal diabetes and partial deletion of the A2BP1 gene.  
920 *Fetal Pediatr Pathol* 30, 161-166.
- 921 89. Lal, D., Trucks, H., Moller, R.S., Hjalgrim, H., Koeleman, B.P., de Kovel, C.G.,  
922 Visscher, F., Weber, Y.G., Lerche, H., Becker, F., et al. (2013). Rare exonic  
923 deletions of the RBFOX1 gene increase risk of idiopathic generalized  
924 epilepsy. *Epilepsia* 54, 265-271.
- 925 90. Gao, C., Ren, S., Lee, J.H., Qiu, J., Chapski, D.J., Rau, C.D., Zhou, Y., Abdellatif, M.,  
926 Nakano, A., Vondriska, T.M., et al. (2016). RBFOX1-mediated RNA splicing  
927 regulates cardiac hypertrophy and heart failure. *J Clin Invest* 126, 195-206.
- 928 91. Earle, N.J., Poppe, K.K., Pilbrow, A.P., Cameron, V.A., Troughton, R.W., Skinner,  
929 J.R., Love, D.R., Shelling, A.N., Whalley, G.A., Ellis, C.J., et al. (2015). Genetic  
930 markers of repolarization and arrhythmic events after acute coronary  
931 syndromes. *Am Heart J* 169, 579-586 e573.
- 932 92. Arking, D.E., Reinier, K., Post, W., Jui, J., Hilton, G., O'Connor, A., Prineas, R.J.,  
933 Boerwinkle, E., Psaty, B.M., Tomaselli, G.F., et al. (2010). Genome-wide  
934 association study identifies GPC5 as a novel genetic locus protective against  
935 sudden cardiac arrest. *PLoS One* 5, e9879.
- 936 93. Rosenberg, R.D., Shworak, N.W., Liu, J., Schwartz, J.J., and Zhang, L. (1997).  
937 Heparan sulfate proteoglycans of the cardiovascular system. Specific  
938 structures emerge but how is synthesis regulated? *J Clin Invest* 100, S67-75.
- 939 94. Genteski-Hamblin, A.M., Song, G., Walsh, R.A., Frenzke, M., Boivin, G.P., Dorn,  
940 G.W., 2nd, Kaetzel, M.A., Horseman, N.D., and Dedman, J.R. (1996). Annexin  
941 VI overexpression targeted to heart alters cardiomyocyte function in  
942 transgenic mice. *Am J Physiol* 270, H1091-1100.
- 943 95. Song, G., Harding, S.E., Duchon, M.R., Tunwell, R., O'Gara, P., Hawkins, T.E., and  
944 Moss, S.E. (2002). Altered mechanical properties and intracellular calcium  
945 signaling in cardiomyocytes from annexin 6 null-mutant mice. *FASEB J* 16,  
946 622-624.
- 947 96. Camors, E., Monceau, V., and Charlemagne, D. (2005). Annexins and Ca<sup>2+</sup>  
948 handling in the heart. *Cardiovasc Res* 65, 793-802.
- 949 97. Meadows, S.M., and Cleaver, O. (2015). Annexin A3 Regulates Early Blood Vessel  
950 Formation. *PLoS One* 10, e0132580.
- 951 98. Adhikari, N., Guan, W., Capaldo, B., Mackey, A.J., Carlson, M., Ramakrishnan, S.,  
952 Walek, D., Gupta, M., Mitchell, A., Eckman, P., et al. (2014). Identification of a  
953 new target of miR-16, Vacuolar Protein Sorting 4a. *PLoS One* 9, e101509.
- 954 99. Porrello, E.R., Johnson, B.A., Aurora, A.B., Simpson, E., Nam, Y.J., Matkovich, S.J.,  
955 Dorn, G.W., 2nd, van Rooij, E., and Olson, E.N. (2011). MiR-15 family  
956 regulates postnatal mitotic arrest of cardiomyocytes. *Circ Res* 109, 670-679.
- 957 100. Hullinger, T.G., Montgomery, R.L., Seto, A.G., Dickinson, B.A., Semus, H.M.,  
958 Lynch, J.M., Dalby, C.M., Robinson, K., Stack, C., Latimer, P.A., et al. (2012).  
959 Inhibition of miR-15 protects against cardiac ischemic injury. *Circ Res* 110,  
960 71-81.
- 961 101. Venkateswaran, A., Sekhar, K.R., Levic, D.S., Melville, D.B., Clark, T.A., Rybski,  
962 W.M., Walsh, A.J., Skala, M.C., Crooks, P.A., Knapik, E.W., et al. (2014). The  
963 NADH oxidase ENOX1, a critical mediator of endothelial cell  
964 radiosensitization, is crucial for vascular development. *Cancer Res* 74, 38-  
965 43.

- 966 102. Weng, L., Hubner, R., Claessens, A., Smits, P., Wauters, J., Tylzanowski, P., Van  
967 Marck, E., and Merregaert, J. (2003). Isolation and characterization of  
968 chondrolectin (Chodl), a novel C-type lectin predominantly expressed in  
969 muscle cells. *Gene* 308, 21-29.
- 970 103. Coppinger, J., McDonald-McGinn, D., Zackai, E., Shane, K., Atkin, J.F., Asamoah,  
971 A., Leland, R., Weaver, D.D., Lansky-Shafer, S., Schmidt, K., et al. (2009).  
972 Identification of familial and de novo microduplications of 22q11.21-q11.23  
973 distal to the 22q11.21 microdeletion syndrome region. *Hum Mol Genet* 18,  
974 1377-1383.
- 975 104. Wentzel, C., Fernstrom, M., Ohrner, Y., Anneren, G., and Thuresson, A.C. (2008).  
976 Clinical variability of the 22q11.2 duplication syndrome. *Eur J Med Genet* 51,  
977 501-510.
- 978 105. Coe, B.P., Witherspoon, K., Rosenfeld, J.A., van Bon, B.W., Vulto-van Silfhout,  
979 A.T., Bosco, P., Friend, K.L., Baker, C., Buono, S., Vissers, L.E., et al. (2014).  
980 Refining analyses of copy number variation identifies specific genes  
981 associated with developmental delay. *Nat Genet* 46, 1063-1071.
- 982 106. Pipes, L., Li, S., Bozinoski, M., Palermo, R., Peng, X., Blood, P., Kelly, S., Weiss,  
983 J.M., Thierry-Mieg, J., Thierry-Mieg, D., et al. (2013). The non-human primate  
984 reference transcriptome resource (NHPRT) for comparative functional  
985 genomics. *Nucleic Acids Res* 41, D906-914.
- 986 107. Vadas, O., Dbouk, H.A., Shymanets, A., Perisic, O., Burke, J.E., Abi Saab, W.F.,  
987 Khalil, B.D., Harteneck, C., Bresnick, A.R., Nurnberg, B., et al. (2013).  
988 Molecular determinants of PI3Kgamma-mediated activation downstream of  
989 G-protein-coupled receptors (GPCRs). *Proc Natl Acad Sci U S A* 110, 18862-  
990 18867.
- 991 108. Izumi, Y. (2013). Drug-induced takotsubo cardiomyopathy. *Heart Fail Clin* 9,  
992 225-231, ix-x.
- 993 109. Ueyama, T. (2004). Emotional stress-induced Tako-tsubo cardiomyopathy:  
994 animal model and molecular mechanism. *Ann N Y Acad Sci* 1018, 437-444.
- 995 110. Kido, K., and Guglin, M. (2017). Drug-Induced Takotsubo Cardiomyopathy.  
996 *Journal of cardiovascular pharmacology and therapeutics*,  
997 1074248417708618.
- 998 111. Schreyer, S., Ledwig, D., Rakatzi, I., Kloting, I., and Eckel, J. (2003). Insulin  
999 receptor substrate-4 is expressed in muscle tissue without acting as a  
1000 substrate for the insulin receptor. *Endocrinology* 144, 1211-1218.
- 1001 112. Fantin, V.R., Lavan, B.E., Wang, Q., Jenkins, N.A., Gilbert, D.J., Copeland, N.G.,  
1002 Keller, S.R., and Lienhard, G.E. (1999). Cloning, tissue expression, and  
1003 chromosomal location of the mouse insulin receptor substrate 4 gene.  
1004 *Endocrinology* 140, 1329-1337.
- 1005 113. Mertens, F., Moller, E., Mandahl, N., Picci, P., Perez-Atayde, A.R., Samson, I.,  
1006 Sciot, R., and Debiec-Rychter, M. (2011). The t(X;6) in subungual exostosis  
1007 results in transcriptional deregulation of the gene for insulin receptor  
1008 substrate 4. *Int J Cancer* 128, 487-491.
- 1009 114. Duenez-Guzman, E.A., and Haig, D. (2014). The evolution of reproduction-  
1010 related NLRP genes. *J Mol Evol* 78, 194-201.
- 1011 115. Snoep, J.D., Gaussem, P., Eikenboom, J.C., Emmerich, J., Zwaginga, J.J., Holmes,  
1012 C.E., Vos, H.L., de Groot, P.G., Herrington, D.M., Bray, P.F., et al. (2010). The  
1013 minor allele of GP6 T13254C is associated with decreased platelet activation

- 1014 and a reduced risk of recurrent cardiovascular events and mortality: results  
1015 from the SMILE-Platelets project. *J Thromb Haemost* 8, 2377-2384.
- 1016 116. Bray, P.F., Howard, T.D., Vittinghoff, E., Sane, D.C., and Herrington, D.M. (2007).  
1017 Effect of genetic variations in platelet glycoproteins Ibalpha and VI on the  
1018 risk for coronary heart disease events in postmenopausal women taking  
1019 hormone therapy. *Blood* 109, 1862-1869.
- 1020 117. Lorenz, K., Schmitt, J.P., Schmitteckert, E.M., and Lohse, M.J. (2009). A new type  
1021 of ERK1/2 autophosphorylation causes cardiac hypertrophy. *Nat Med* 15,  
1022 75-83.
- 1023 118. Dimassi, S., Labalme, A., Lesca, G., Rudolf, G., Bruneau, N., Hirsch, E.,  
1024 Arzimanoglou, A., Motte, J., de Saint Martin, A., Boutry-Kryza, N., et al.  
1025 (2014). A subset of genomic alterations detected in rolandic epilepsies  
1026 contains candidate or known epilepsy genes including GRIN2A and PRRT2.  
1027 *Epilepsia* 55, 370-378.
- 1028 119. Zhao, Y.Y., Sawyer, D.R., Baliga, R.R., Opel, D.J., Han, X., Marchionni, M.A., and  
1029 Kelly, R.A. (1998). Neuregulins promote survival and growth of cardiac  
1030 myocytes. Persistence of ErbB2 and ErbB4 expression in neonatal and adult  
1031 ventricular myocytes. *J Biol Chem* 273, 10261-10269.
- 1032 120. Berg, R.W., Leung, E., Gough, S., Morris, C., Yao, W.P., Wang, S.X., Ni, J., and  
1033 Krissansen, G.W. (1999). Cloning and characterization of a novel beta  
1034 integrin-related cDNA coding for the protein TIED ("ten beta integrin EGF-  
1035 like repeat domains") that maps to chromosome band 13q33: A divergent  
1036 stand-alone integrin stalk structure. *Genomics* 56, 169-178.
- 1037 121. Wheeler, H.E., Shah, K.P., Brenner, J., Garcia, T., Aquino-Michaels, K.,  
1038 Consortium, G.T., Cox, N.J., Nicolae, D.L., and Im, H.K. (2016). Survey of the  
1039 Heritability and Sparse Architecture of Gene Expression Traits across  
1040 Human Tissues. *PLoS Genet* 12, e1006423.
- 1041 122. Wittstein, I.S., Thiemann, D.R., Lima, J.A., Baughman, K.L., Schulman, S.P.,  
1042 Gerstenblith, G., Wu, K.C., Rade, J.J., Bivalacqua, T.J., and Champion, H.C.  
1043 (2005). Neurohumoral features of myocardial stunning due to sudden  
1044 emotional stress. *N Engl J Med* 352, 539-548.
- 1045 123. Voight, B.F., Kang, H.M., Ding, J., Palmer, C.D., Sidore, C., Chines, P.S., Burt, N.P.,  
1046 Fuchsberger, C., Li, Y., Erdmann, J., et al. (2012). The metabochip, a custom  
1047 genotyping array for genetic studies of metabolic, cardiovascular, and  
1048 anthropometric traits. *PLoS Genet* 8, e1002793.
- 1049 124. Eitel, I., Moeller, C., Munz, M., Stiermaier, T., Meitinger, T., Thiele, H., and  
1050 Erdmann, J. (2017). Genome-wide association study in takotsubo syndrome  
1051 - Preliminary results and future directions. *Int J Cardiol* 236, 335-339.
- 1052 125. Redon, R., Ishikawa, S., Fitch, K.R., Feuk, L., Perry, G.H., Andrews, T.D., Fiegler,  
1053 H., Shapero, M.H., Carson, A.R., Chen, W., et al. (2006). Global variation in  
1054 copy number in the human genome. *Nature* 444, 444-454.
- 1055 126. McCarroll, S.A., and Altshuler, D.M. (2007). Copy-number variation and  
1056 association studies of human disease. *Nat Genet* 39, S37-42.
- 1057 127. Stranger, B.E., Forrest, M.S., Dunning, M., Ingle, C.E., Beazley, C., Thorne, N.,  
1058 Redon, R., Bird, C.P., de Grassi, A., Lee, C., et al. (2007). Relative impact of  
1059 nucleotide and copy number variation on gene expression phenotypes.  
1060 *Science* 315, 848-853.
- 1061 128. Purcell, S.M., Moran, J.L., Fromer, M., Ruderfer, D., Solovieff, N., Roussos, P.,  
1062 O'Dushlaine, C., Chambert, K., Bergen, S.E., Kahler, A., et al. (2014). A

- 1063 polygenic burden of rare disruptive mutations in schizophrenia. *Nature* 506,  
1064 185-190.
- 1065 129. Helbig, I., Swinkels, M.E., Aten, E., Caliebe, A., van 't Slot, R., Boor, R., von  
1066 Spiczak, S., Muhle, H., Jahn, J.A., van Binsbergen, E., et al. (2014). Structural  
1067 genomic variation in childhood epilepsies with complex phenotypes. *Eur J*  
1068 *Hum Genet* 22, 896-901.
- 1069 130. Hooli, B.V., Kovacs-Vajna, Z.M., Mullin, K., Blumenthal, M.A., Mattheisen, M.,  
1070 Zhang, C., Lange, C., Mohapatra, G., Bertram, L., and Tanzi, R.E. (2014). Rare  
1071 autosomal copy number variations in early-onset familial Alzheimer's  
1072 disease. *Mol Psychiatry* 19, 676-681.
- 1073 131. Gilissen, C., Hehir-Kwa, J.Y., Thung, D.T., van de Vorst, M., van Bon, B.W.,  
1074 Willemsen, M.H., Kwint, M., Janssen, I.M., Hoischen, A., Schenck, A., et al.  
1075 (2014). Genome sequencing identifies major causes of severe intellectual  
1076 disability. *Nature* 511, 344-347.
- 1077 132. Mefford, H.C., Yendle, S.C., Hsu, C., Cook, J., Geraghty, E., McMahon, J.M., Eeg-  
1078 Olofsson, O., Sadleir, L.G., Gill, D., Ben-Zeev, B., et al. (2011). Rare copy  
1079 number variants are an important cause of epileptic encephalopathies. *Ann*  
1080 *Neurol* 70, 974-985.
- 1081 133. Hitz, M.P., Lemieux-Perreault, L.P., Marshall, C., Feroz-Zada, Y., Davies, R., Yang,  
1082 S.W., Lionel, A.C., D'Amours, G., Lemyre, E., Cullum, R., et al. (2012). Rare  
1083 copy number variants contribute to congenital left-sided heart disease. *PLoS*  
1084 *Genet* 8, e1002903.
- 1085 134. White, P.S., Xie, H.M., Werner, P., Glessner, J., Latney, B., Hakonarson, H., and  
1086 Goldmuntz, E. (2014). Analysis of chromosomal structural variation in  
1087 patients with congenital left-sided cardiac lesions. *Birth Defects Res A Clin*  
1088 *Mol Teratol*.
- 1089 135. Fakhro, K.A., Choi, M., Ware, S.M., Belmont, J.W., Towbin, J.A., Lifton, R.P.,  
1090 Khokha, M.K., and Brueckner, M. (2011). Rare copy number variations in  
1091 congenital heart disease patients identify unique genes in left-right  
1092 patterning. *Proc Natl Acad Sci U S A* 108, 2915-2920.
- 1093 136. Glessner, J.T., Bick, A.G., Ito, K., Homys, J.G., Rodriguez-Murillo, L., Fromer, M.,  
1094 Mazaika, E., Vardarajan, B., Italia, M., Leipzig, J., et al. (2014). Increased  
1095 frequency of de novo copy number variants in congenital heart disease by  
1096 integrative analysis of single nucleotide polymorphism array and exome  
1097 sequence data. *Circ Res* 115, 884-896.
- 1098 137. Barc, J., Briec, F., Schmitt, S., Kyndt, F., Le Cunff, M., Baron, E., Vieyres, C.,  
1099 Sacher, F., Redon, R., Le Caignec, C., et al. (2011). Screening for copy number  
1100 variation in genes associated with the long QT syndrome: clinical relevance.  
1101 *J Am Coll Cardiol* 57, 40-47.
- 1102 138. Silversides, C.K., Lionel, A.C., Costain, G., Merico, D., Migita, O., Liu, B., Yuen, T.,  
1103 Rickaby, J., Thiruvahindrapuram, B., Marshall, C.R., et al. (2012). Rare copy  
1104 number variations in adults with tetralogy of Fallot implicate novel risk  
1105 gene pathways. *PLoS Genet* 8, e1002843.
- 1106 139. Roberts, J.L., Hovanes, K., Dasouki, M., Manzardo, A.M., and Butler, M.G. (2014).  
1107 Chromosomal microarray analysis of consecutive individuals with autism  
1108 spectrum disorders or learning disability presenting for genetic services.  
1109 *Gene* 535, 70-78.
- 1110 140. Battaglia, A., Doccini, V., Bernardini, L., Novelli, A., Loddo, S., Capalbo, A.,  
1111 Filippi, T., and Carey, J.C. (2013). Confirmation of chromosomal microarray

- 1112 as a first-tier clinical diagnostic test for individuals with developmental  
1113 delay, intellectual disability, autism spectrum disorders and dysmorphic  
1114 features. *Eur J Paediatr Neurol* 17, 589-599.
- 1115 141. Chong, W.W., Lo, I.F., Lam, S.T., Wang, C.C., Luk, H.M., Leung, T.Y., and Choy,  
1116 K.W. (2014). Performance of chromosomal microarray for patients with  
1117 intellectual disabilities/developmental delay, autism, and multiple  
1118 congenital anomalies in a Chinese cohort. *Molecular cytogenetics* 7, 34.
- 1119 142. Mc Cormack, A., Claxton, K., Ashton, F., Asquith, P., Atack, E., Mazzaschi, R.,  
1120 Moverley, P., O'Connor, R., Qorri, M., Sheath, K., et al. (2016). Microarray  
1121 testing in clinical diagnosis: an analysis of 5,300 New Zealand patients.  
1122 *Molecular cytogenetics* 9, 29.
- 1123 143. Ruusala, A., and Aspenstrom, P. (2004). Isolation and characterisation of  
1124 DOCK8, a member of the DOCK180-related regulators of cell morphology.  
1125 *FEBS Lett* 572, 159-166.
- 1126 144. Engelhardt, K.R., McGhee, S., Winkler, S., Sassi, A., Woellner, C., Lopez-Herrera,  
1127 G., Chen, A., Kim, H.S., Lloret, M.G., Schulze, I., et al. (2009). Large deletions  
1128 and point mutations involving the dedicator of cytokinesis 8 (DOCK8) in the  
1129 autosomal-recessive form of hyper-IgE syndrome. *J Allergy Clin Immunol*  
1130 124, 1289-1302 e1284.
- 1131 145. Al Mutairi, M., Al-Mousa, H., AlSaud, B., Hawwari, A., AlJoufan, M., AlWesaibi, A.,  
1132 AlHalees, Z., and Al-Mayouf, S.M. (2014). Grave aortic aneurysmal dilatation  
1133 in DOCK8 deficiency. *Mod Rheumatol* 24, 690-693.
- 1134 146. Sternecker, J.L., Reinhardt, P., and Scholer, H.R. (2014). Investigating human  
1135 disease using stem cell models. *Nat Rev Genet* 15, 625-639.
- 1136 147. Ma, D., Wei, H., Lu, J., Ho, S., Zhang, G., Sun, X., Oh, Y., Tan, S.H., Ng, M.L., Shim,  
1137 W., et al. (2013). Generation of patient-specific induced pluripotent stem  
1138 cell-derived cardiomyocytes as a cellular model of arrhythmogenic right  
1139 ventricular cardiomyopathy. *Eur Heart J* 34, 1122-1133.
- 1140  
1141  
1142  
1143

1144 **Figure titles and legends**

1145

1146 **Figure 1.** CNV detected in EqSCM case 01. **A:** Chromosomal location of the  
1147 CNV at the RBFOX1 locus of chromosome 16. **B:** Enlargement of the fifteen  
1148 probe deletion (139kb, delimited by vertical green lines and blue shading)  
1149 illustrating loss of the fMet-containing exon (pale blue vertical bar) for three  
1150 major RBFOX1 isoforms. DGV track of known CNVs shown at bottom of figure,  
1151 beneath the genes2 and regions of interest tracks. Graphical views from  
1152 Genoglyphix (PerkinElmer) software.

1153

1154

1155 **Figure 2.** Genome wide distribution of CNVs. CNVs detected in 12 (of 28)  
1156 EqSCM individuals by aCGH analysis. Numbers beside arrows relate to EqSCM  
1157 patient number. Red arrows denote deletions, blue arrows duplications. Note  
1158 that EqSCM 03, EqSCM 06, EqSCM 11 carry two rare CNVs, while EqSCM 19  
1159 contains three.

1160

1161

1162

1163

1164 **Figure 1**

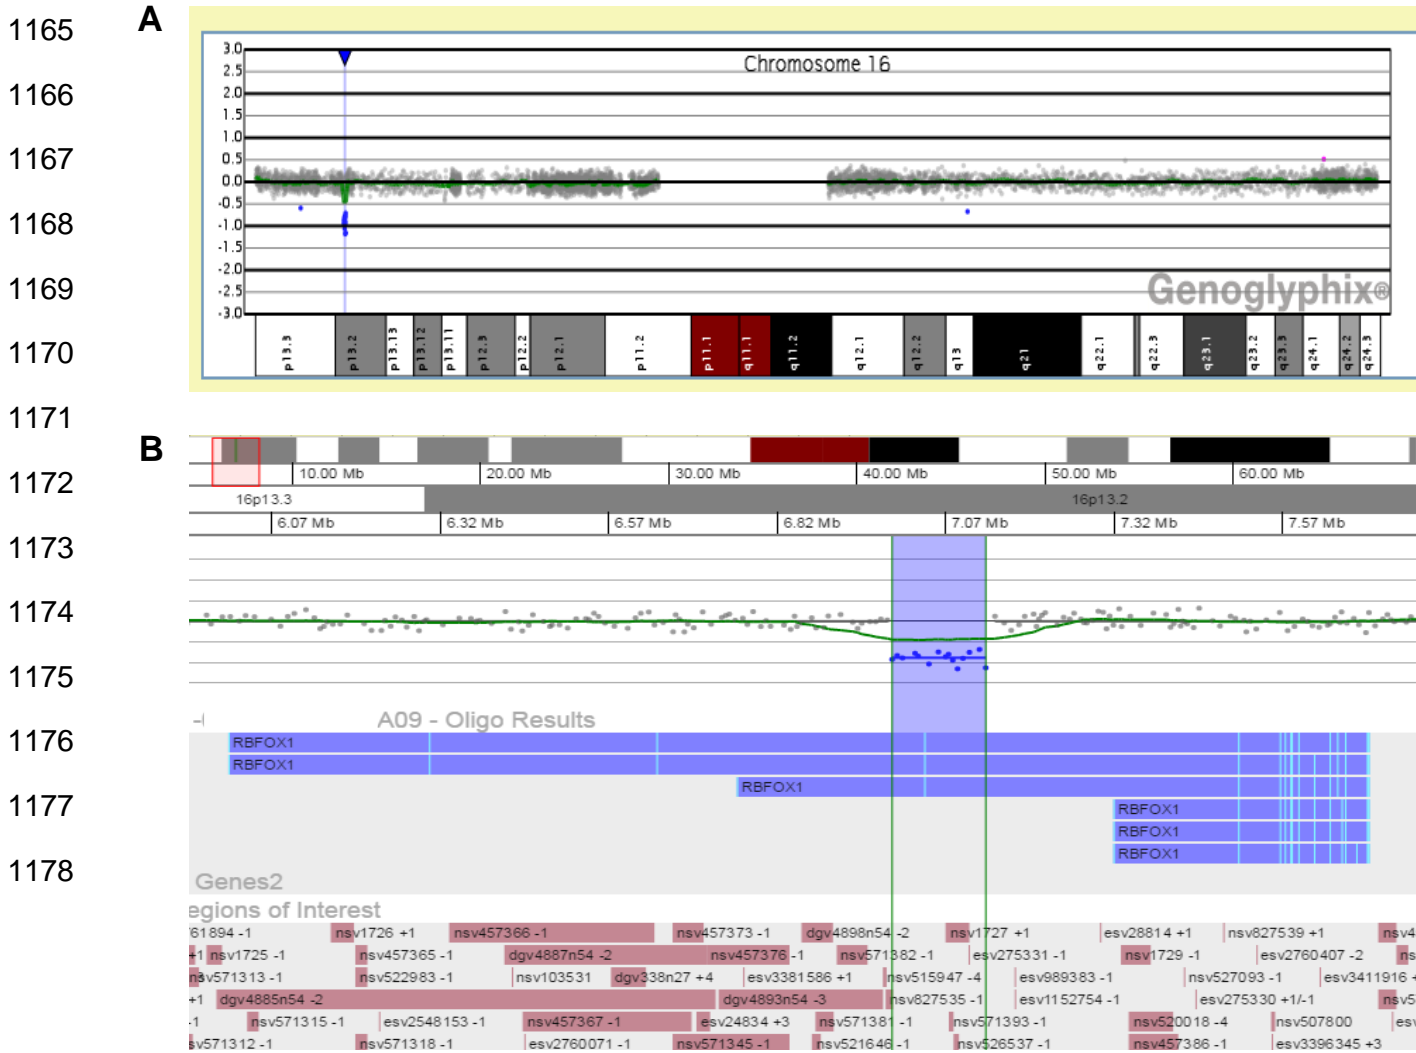



1179 **Figure 2.**  
1180

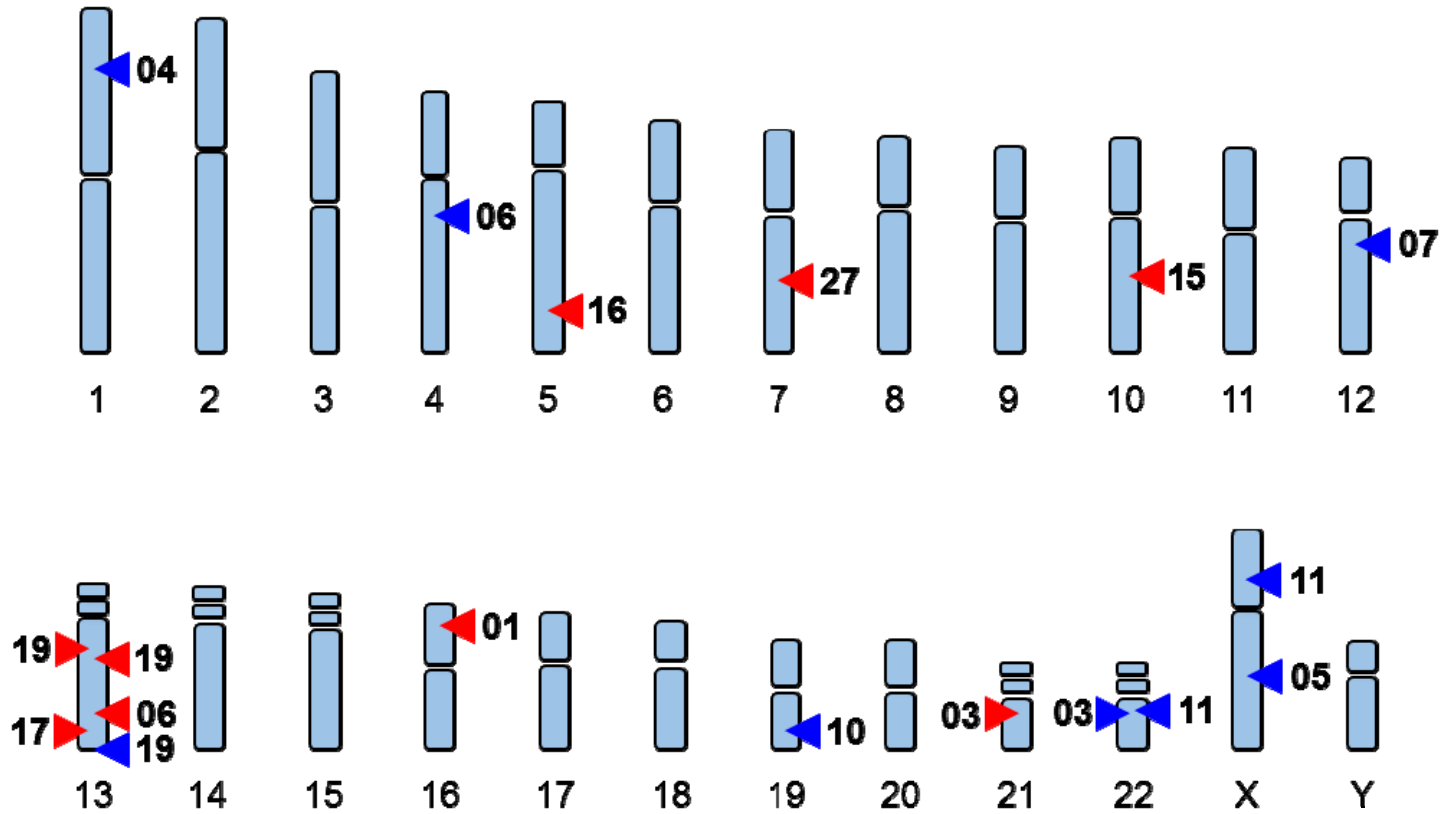

1181  
1182

1183 **Table titles and legends**

1184

1185 **Table 1.** SNP markers removed from Cardio-MetaboChip analysis in quality  
1186 control

1187

| <b>Stage of analysis</b>          | <b>Number of SNPs</b> | <b>Comments</b>                                                |
|-----------------------------------|-----------------------|----------------------------------------------------------------|
| Assayed                           | 196,725               |                                                                |
| No genotype                       | 10,927                |                                                                |
| Mono allelic                      | 28,367                |                                                                |
| MAF <0.004                        | 44,424                | SNPs with only 1 minor allele found                            |
| Missing > 0.02 of samples         | 36,884                |                                                                |
| HWE fail                          | 130                   | HWE_P <1e-20 and 1.5x more heterozygotes than expected         |
| Total Removed                     | 65,622                | Note that SNPs could fail on two or more of the criteria above |
| <b>SNPs remaining in analysis</b> | <b>131,103</b>        |                                                                |

1188

**Table 2.** Rare CNVs detected in a cohort of 28 EqSCM cases.

| Case ID         | Prediction* | Location   | Del/Dup | Key genes**              | Size  | Frequency | Location                           |
|-----------------|-------------|------------|---------|--------------------------|-------|-----------|------------------------------------|
| <b>EqSCM 01</b> | UCS         | 16p13.2    | DEL     | RBFOX1**                 | 139kb | 1/20000   | HG19 chr16:7,054,481-7,193,526     |
| <b>EqSCM 03</b> | UCS         | 21q21.1    | DEL     | CHODL**                  | 96kb  | 1/9000    | HG19 chr21:19,537,178-19,633,275   |
|                 | CS          | 22q11.26.1 | DUP     |                          | 2Mb   |           | HG19 chr22:23,055,148-24,991,669   |
| <b>EqSCM 04</b> | UCS         | 1p34.1     | DUP     | IPP** PIK3R3 (+3 others) | 455kb | 1/7000    | HG19 chr1:46,144,479-46,599,815    |
| <b>EqSCM 05</b> | UCS         | Xq22.3     | DUP     | IRS4** COL4A5**          | 113kb | 1/2000    | HG19 chrX:107,896,435-108,009,609  |
| <b>EqSCM 06</b> | UCS         | 13q31.5    | DEL     | GPC5**                   | 207kb | 1/5000    | HG19 chr13:92,075,673-92,283,600   |
|                 | UCS         | 4q21.21    | DUP     | FRAS1 ANX3** LINC01094   | 329kb | 1/29000   | HG19 chr4:79,281,048-79,610,796    |
| <b>EqSCM 07</b> | UCS         | 12q13.13   | DUP     | 17 Keratin genes         | 411kb | 0         | HG19 chr12:52,657,396-53,069,013   |
| <b>EqSCM 10</b> | UCS         | 19q13.42   | DUP     | GP6**                    | 130kb | 1/15000   | HG19 chr19:55,439,927-55,570,442   |
| <b>EqSCM 11</b> | UCS         | 22q11.21   | DUP     | YPEL1** (+ 2 others)     | 180kb | 0         | HG19 chr22:22,008,249-22,189,094   |
|                 | UCS         | Xp11.4     | DUP     | TSPAN7**                 | 140kb | 1/1000    | HG19 chrX:38,485,991-38,626,762    |
| <b>EqSCM 15</b> | UCS         | 10q23.1    | DUP     | upstream NRG3**          | 78kb  | 0         | HG19 chr10:83,506,502-83,585,097   |
| <b>EqSCM 17</b> | UCS         | 13q33.1    | DEL     | ITGBL1**                 | 148kb | 0         | HG19 chr13:102,148,514-102,296,766 |
| <b>EqSCM 19</b> | ?CS         | 13q14.2    | DEL     | KCNRG (+ 6 others)       | 886kb | 0         | HG19 chr13:50,585,186-51,452,033   |
|                 | UCS         | 13q34      | DUP     | LINC00346, ANKRD10       | 146kb | 0         | HG19 chr13:111,385,673-111,532,564 |
|                 | UCS         | 13q14.11   | DUP     | ENOX1**                  | 149kb | 0         | HG19 chr13:89,219,432-89,359,036   |
| <b>EqSCM 27</b> | UCS         | 7q31.1     | DEL     | LRRN3** IMMP2L           | 105kb | 1/12000   | HG19 chr7:110,744,611-110,849,681  |

\*UCS = unclear clinical significance, ?CS = potential clinical significance. \*\*Genes with clear cardiovascular association. Frequency calculations are based on larger (>1000 individuals) studies included in the DGV. A full list of all CNVs detected for each individual is presented in Supplementary Table 1.

## Supplemental data

Table S1: Complete CNV detection list of EqSCM cases in this study. (Separate Excel spreadsheet).

Figure S1: CNV interpretation algorithm (Separate word file doc)
